# Supplementary material for: NO x emissions, isoprene oxidation pathways, vertical mixing, and implications for surface ozone in the Southeast United States
Source: Copernicus journal article supplement (doi:10.5194/acp-2016-110), 2016-03-16
Supplement: Supplementary file [file acp-2016-110-AC2-supplement.pdf]

# ~~NO<sub>x</sub> emissions, isoprene oxidation pathways, vertical mixing, and implications for surface ozone~~ Why do Models Overestimate Surface Ozone in the Southeastern United States?

5 Katherine R. Travis<sup>1</sup>, Daniel J. Jacob<sup>1,2</sup>, Jenny A. Fisher<sup>3,4</sup>, Patrick S. Kim<sup>2</sup>, Eloise A. Marais<sup>1</sup>, Lei Zhu<sup>1</sup>, Karen Yu<sup>1</sup>, Christopher C. Miller<sup>1</sup>, Robert M. Yantosca<sup>1</sup>, Melissa P. Sulprizio<sup>1</sup>, Anne M. Thompson<sup>5</sup>, Paul O. Wennberg<sup>6,7</sup>, John D. Crouse<sup>6</sup>, Jason M. St. Clair<sup>6</sup>, Ronald C. Cohen<sup>8</sup>, Joshua L. Laughner<sup>8</sup>, Jack E. Dibb<sup>9</sup>, Samuel R. Hall<sup>10</sup>, Kirk Ullmann<sup>10</sup>, Glenn M. Wolfe<sup>11,12</sup>, Illana B. Pollack<sup>13</sup>, Jeff Peischl<sup>14,15</sup>, Jonathan A. Neuman<sup>14,15</sup>, and Xianliang Zhou<sup>16,17</sup>

10 <sup>1</sup>Department of Earth and Planetary Sciences and School of Engineering and Applied Sciences, Harvard University, Cambridge, Massachusetts, USA

<sup>2</sup>Earth and Planetary Sciences, Harvard University, Cambridge, MA, USA

<sup>3</sup>Centre for Atmospheric Chemistry, School of Chemistry, University of Wollongong, Wollongong, NSW, Australia

<sup>4</sup>School of Earth and Environmental Sciences, University of Wollongong, Wollongong, NSW, Australia

<sup>5</sup>NASA Goddard Space Flight Center, Greenbelt, Maryland, USA

15 <sup>6</sup>Division of Geological and Planetary Sciences, California Institute of Technology, Pasadena, CA, USA

<sup>7</sup>Division of Engineering and Applied Science, California Institute of Technology, Pasadena, CA, USA

<sup>8</sup>Department of Chemistry, University of California, Berkeley, CA, USA

<sup>9</sup>Earth System Research Center, University of New Hampshire, Durham, NH, USA

<sup>10</sup>Atmospheric Chemistry Division, National Center for Atmospheric Research, Boulder, CO, USA

20 <sup>11</sup>Atmospheric Chemistry and Dynamics Laboratory, NASA Goddard Space Flight Center, Greenbelt, MD, USA

<sup>12</sup>Joint Center for Earth Systems Technology, University of Maryland Baltimore County, Baltimore, MD, USA

<sup>13</sup>Atmospheric Science Department, Colorado State University, Fort Collins, Colorado, USA

<sup>14</sup>University of Colorado, Cooperative Institute for Research in Environmental Sciences, Boulder, CO, USA

<sup>15</sup>NOAA, Division of Chemical Science, Earth Systems Research Lab, Boulder, CO USA

25 <sup>16</sup>Department of Environmental Health and Toxicology, School of Public Health, State University of New York at Albany, Albany, New York, USA

<sup>17</sup>Wadsworth Center, New York State Department of Health, Albany, New York, USA

*Correspondence to:* Katherine R. Travis (ktravis@fas.harvard.edu)

30 **Abstract.** Ozone pollution in the Southeast US involves complex chemistry driven by emissions of anthropogenic nitrogen oxide radicals ( $\text{NO}_x = \text{NO} + \text{NO}_2$ ) and biogenic isoprene. Model estimates of surface ozone concentrations tend to be biased high in the region and this is of concern for designing effective emission control strategies to meet air quality standards. We use detailed chemical observations from the SEAC<sup>4</sup>RS aircraft campaign in August and September 2013, interpreted with the GEOS-Chem chemical transport model (~~CTM~~) at  $0.25^\circ \times 0.3125^\circ$  horizontal resolution, to better understand the factors  
35 controlling surface ozone in the Southeast US. We find that the National Emission Inventory (NEI) for  $\text{NO}_x$  from the US Environmental Protection Agency (EPA) is too high in the Southeast and nationally by ~~50%~~ a factor of 2. This ~~finding is demonstrated by~~ based on SEAC<sup>4</sup>RS observations of  $\text{NO}_x$  and its oxidation products, ~~by~~ surface network observations of nitrate wet deposition fluxes, and ~~by~~ OMI satellite observations of tropospheric  $\text{NO}_2$  columns. Upper tropospheric  $\text{NO}_2$  from

lightning makes a large contribution to the satellite observations that must be accounted for when using these data to estimate surface NO<sub>x</sub> emissions. ~~Aircraft observations of upper tropospheric NO<sub>2</sub> are higher than simulated by GEOS-Chem or expected from NO-NO<sub>2</sub>-O<sub>3</sub> photochemical stationary state. NO<sub>x</sub> levels in the Southeast US are sufficiently low.~~ We find that only half of isoprene oxidation proceeds by the high-NO<sub>x</sub> pathway to produce ozone; this fraction is only moderately sensitive to changes in NO<sub>x</sub> emissions because isoprene and NO<sub>x</sub> emissions are spatially segregated. GEOS-Chem with reduced NO<sub>x</sub> emissions provides an unbiased simulation of ozone observations from the aircraft ~~and from ozonesondes~~, and reproduces the observed ozone production efficiency in the boundary layer as derived from a regression of ozone and NO<sub>x</sub> oxidation products. However, the model is still biased high by 8±13 ppb relative to observed surface ozone in the Southeast US. Ozonesondes launched during midday hours show a 7 ppb ozone decrease from 1.5 km to ~~0.2 km altitude, whereas~~ ~~GEOS-Chem has no such gradient because of efficient boundary layer mixing. We conclude that model biases in simulating surface ozone over the Southeast US may be due to a combination of excessive NO<sub>x</sub> emissions and excessive boundary layer vertical mixing~~ the surface that GEOS-Chem does not capture. This may be caused by excessively dry conditions in the model, representing another factor important in the simulation of surface ozone.

## 1 Introduction

Ground-level ozone is a harmful air pollutant ~~that causes adverse~~ for human health and ~~environmental impacts~~ vegetation. Ozone is produced in the troposphere when volatile organic compounds (VOCs) and carbon monoxide (CO) are photochemically oxidized in the presence of nitrogen oxide radicals (NO<sub>x</sub> = NO+NO<sub>2</sub>). The mechanism for producing ozone is complicated, involving hundreds of chemical species interacting with transport on ~~multiple time~~ all scales. In October 2015, the US Environmental Protection Agency (EPA) set a new National Ambient Air Quality Standard (NAAQS) for surface ozone as a maximum daily 8-h average (MDA8) of 0.070 ppm not to be exceeded more than three times per year. This is the latest in a succession of gradual tightening of the NAAQS from 0.12 ppm (1-h average) to 0.08 ppm in 1997, and to 0.075 ppm in 2008, responding to accumulating evidence that ozone is detrimental to public health even at low concentrations (EPA, 2013). Chemical transport models (CTMs) tend to significantly overestimate surface ozone in the ~~southeastern~~ Southeast US (Lin et al., 2008; Fiore et al., 2009; Reidmiller et al., 2009; Brown-Steiner et al., 2015; Canty et al., 2015). Here we ~~address this issue~~ examine why by using the GEOS-Chem CTM to simulate NASA SEAC<sup>4</sup>RS aircraft observations of ozone and its precursors over the Southeast US region in August-September 2013 ~~from the NASA SEAC<sup>4</sup>RS campaign~~ (Toon et al., 2016) ~~and including~~, together with additional observations from surface networks.

A number of explanations have been proposed for the ozone model biases in the Southeast US. Fiore et al. (2003) suggested excessive modeled ozone inflow from the Gulf of Mexico. Lin et al. (2008) proposed that the ozone dry deposition velocity could be underestimated. McDonald-Buller et al. (2011) pointed out the potential role of halogen chemistry as a sink of ozone. Isoprene is the principal VOC precursor of ozone in the Southeast US in summer, ~~contingent on the supply of NO<sub>x</sub>~~

(Chameides et al., 1992) and Fiore et al. (2005) found that a major source of uncertainty is the magnitude of isoprene emissions from vegetation and the loss of NO<sub>x</sub> through formation of isoprene nitrates. Horowitz et al. (2007) found a large sensitivity of ozone to the fate of isoprene nitrates and the extent to which they release NO<sub>x</sub> when oxidized. Squire et al. (2015) found that the choice of isoprene oxidation mechanism can alter both the sign and magnitude of the response of ozone to isoprene and NO<sub>x</sub> emissions.

The SEAC<sup>4</sup>RS aircraft campaign in August-September 2013 provided an outstanding opportunity to improve our understanding of ozone chemistry over the Southeast US. The SEAC<sup>4</sup>RS DC-8 aircraft hosted an unprecedented chemical payload including isoprene and its oxidation products, NO<sub>x</sub> and its oxidation products, and ozone. The flights featured extensive boundary layer mapping of the Southeast as well as vertical profiling to the free troposphere (Toon et al., 2016). We use the GEOS-Chem global CTM with high horizontal resolution over North America (0.25°×0.3125°) to simulate and interpret the SEAC<sup>4</sup>RS observations. We integrate into our analysis additional Southeast US observations during the summer of 2013 including the NOMADSS aircraft campaign, the SOAS surface site in Alabama, the SEACIONS ozonesonde network, ~~other surface networks~~ the CASTNET ozone network, the NADP nitrate wet deposition network, and NO<sub>2</sub> satellite data from the OMI instrument. Several companion papers apply GEOS-Chem to simulate other aspects of SEAC<sup>4</sup>RS and concurrent data for the Southeast US including aerosol sources and optical depth (Kim et al., 2015), isoprene organic aerosol (Marais et al., 2015, 2016), organic nitrates (Fisher et al., 2016), formaldehyde and its relation to satellite observations (Zhu et al., 2016), and sensitivity to model resolution (Yu et al., 2016).

## 2 GEOS-Chem Model Description

We use the GEOS-Chem global 3-D CTM (Bey et al., 2001) in version 9.02 (www.geos-chem.org) with modifications described below. GEOS-Chem is driven with assimilated meteorological data from the Goddard Earth Observing System – Forward Processing (GEOS-5.11.0) of the NASA Global Modeling and Assimilation Office (GMAO). The GEOS-5.11.0 data have a native horizontal resolution of 0.25° latitude by 0.3125° longitude and a temporal resolution of 3 h (1 h for surface variables and mixing depths). We use a nested version of GEOS-Chem (Chen et al., 2009) with native 0.25° × 0.3125° horizontal resolution over North America and adjacent oceans (130° - 60°W, 9.75° - 60°N) and dynamic boundary conditions from a global simulation with 4° × 5° horizontal resolution. ~~Boundary~~ Turbulent boundary layer mixing follows ~~the~~ non-local parameterization based on K-theory (Holtslag and Boville, 1993) implemented in GEOS-Chem by Lin and McElroy (2010). Daytime mixing depths are reduced by 40% as described by Kim et al. (2015) and Zhu et al. (2016) to match lidar observations of boundary layer height from SEAC<sup>4</sup>RS. We conducted the GEOS-Chem nested model simulation for August-September 2013, following six months of initialization at 4° × 5° resolution.

## 2.1 Chemistry

The chemical mechanism in GEOS-Chem version 9.02 ~~are presented~~ is described by Mao et al. (2010, 2013). Here, we have aerosol reactive uptake of HO<sub>2</sub> produce H<sub>2</sub>O<sub>2</sub>, instead of H<sub>2</sub>O as in Mao et al. (2013), to better match H<sub>2</sub>O<sub>2</sub> observations in SEAC<sup>4</sup>RS. ~~Isoprene chemistry is of particular interest for our application and we~~ We include a number of updates to isoprene chemistry, listed comprehensively ~~as in the~~ Supplementary Material (Tables S1 and S2) ~~and describe here more specifically the low-NO<sub>x</sub> pathways~~. Companion papers describe the updates relevant to isoprene nitrates (Fisher et al., 2016) and organic aerosol formation (Marais et al., 2015). ~~We focus below on updates to the low-NO<sub>x</sub> pathways for isoprene oxidation where recent lab and field studies have made significant progress.~~2016). Oxidation of biogenic monoterpenes was also added to the GEOS-Chem mechanism (Fisher et al., 2016) but does not significantly affect ozone.

A critical issue in isoprene chemistry is the fate of the isoprene peroxy radicals (ISOPO<sub>2</sub>) produced from the oxidation of isoprene by OH (the dominant isoprene sink). When NO<sub>x</sub> is sufficiently high, ISOPO<sub>2</sub> reacts mainly with NO to produce ozone (high-NO<sub>x</sub> pathway). At lower NO<sub>x</sub> levels, ISOPO<sub>2</sub> may instead react with HO<sub>2</sub> or other organic peroxy radicals, or isomerize, in which case ozone is not produced (low-NO<sub>x</sub> pathways). Here we increase the molar yield of isoprene hydroperoxide (ISOPOOH) from the ISOPO<sub>2</sub> + HO<sub>2</sub> reaction to 93.7% ~~using high precision~~ based on observations of the minor channels of this reaction ~~from~~ (Liu et al., 2013). Oxidation of ISOPOOH by OH produces isoprene epoxides (IEPOX) that subsequently react with OH or are taken up by aerosol (Paulot et al., 2009b; Marais et al., 2015)2016). We use updated rates and products from Bates et al. (2014) for the reaction of IEPOX with OH. ~~We revise the oxidation products of first generation isoprene nitrates (ISOPN) with OH according to Jacobs et al. (2014).~~

ISOPO<sub>2</sub> isomerization produces hydroperoxyaldehydes (HPALDs) (Peeters et al., 2009; Crounse et al., 2011; Wolfe et al., 2012), and this is now explicitly included in the mechanism. HPALDs go on to react with OH or photolyze at roughly equal rates over the Southeast US. We use the HPALD+OH reaction rate constant from Wolfe et al. (2012) and the products of the reaction from Squire et al. (2015). The HPALD photolysis rate is calculated using the absorption cross-section of MACR, with a quantum yield of 1, as recommended by Peeters and Müller (2010). The photolysis products are taken from Stavrou et al. (2010). We include a faster rate constant and revise the product yields for the self-reaction of ISOPO<sub>2</sub> according to Xie et al. (2013).

A number of studies have suggested that conversion of NO<sub>2</sub> to nitrous acid (HONO) by gas-phase or aerosol-phase pathways could provide a source of HO<sub>x</sub> radicals following HONO photolysis (Li et al., 2014; Zhou et al., 2014). This mechanism would also provide a catalytic sink for ozone when NO<sub>2</sub> is produced by the NO + ozone reaction, viz.,

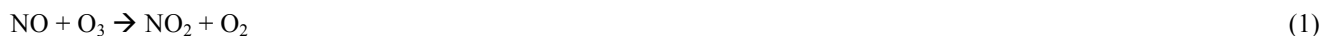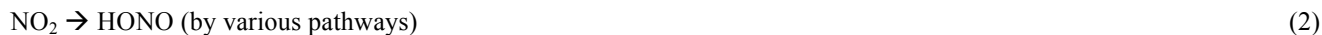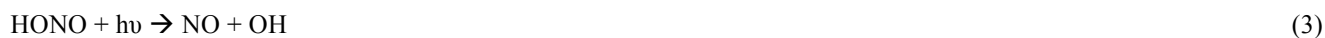

Observations of HONO from the NOMADSS campaign (<https://www2.acom.ucar.edu/campaigns/nomadss>) indicate a mean daytime HONO concentration of 10 ppt in the Southeast US boundary layer (Zhou et al., 2014), whereas the standard gas-phase mechanism in GEOS-Chem version 9.02 yields less than 1 ppt. We added to the mechanism the pathway proposed by Li et al. (2014), in which HONO is produced by the reaction of the  $\text{HO}_2 \cdot \text{H}_2\text{O}$  complex with  $\text{NO}_2$ , and reduced the corresponding rate constant to  $k_{\text{HO}_2 \cdot \text{H}_2\text{O} + \text{NO}_2} = 2 \times 10^{-12} \text{ cm}^3 \text{ molecule}^{-1} \text{ s}^{-1}$  in order to obtain ~10 ppt daytime HONO in the Southeast US boundary layer. The resulting impact on boundary layer ozone concentrations is negligible. ~~HONO production may also take place by photolysis of aerosol nitrate (Ye et al., 2016).~~

## 2.2 Dry Deposition

The GEOS-Chem dry deposition scheme uses a resistance-in-series model based on Wesely (1989) as implemented by Wang et al. (1998). Underestimate of dry deposition has been invoked as a cause for model overestimates of ozone in the eastern US (Lin et al., 2008; Walker, 2014). Daytime ozone deposition is determined principally by stomatal uptake. Here, we decrease the stomatal resistance from  $200 \text{ s m}^{-1}$  for both coniferous and deciduous forests (Wesely, 1989) by 20% to match summertime measurements of the ozone dry deposition velocity for a pine forest in North Carolina (Finkelstein et al., 2000) and for the Ozarks oak forest in southeast Missouri (Wolfe et al., 2015), both averaging  $0.8 \text{ cm s}^{-1}$  in the daytime. The mean ozone deposition velocity in GEOS-Chem along the SEAC<sup>4</sup>RS boundary layer flight tracks in the Southeast US averages  $0.7 \pm 0.3 \text{ cm s}^{-1}$  for the daytime (9-16 local) surface layer. Deposition is suppressed in the model at night due to both stomatal closure and near-surface stratification, consistent with the Finkelstein et al. (2000) observations.

Deposition flux measurements for isoprene oxidation products at the Alabama SOAS site (<http://soas2013.rutgers.edu>) ~~indicated~~ indicate higher deposition velocities than simulated by ~~the standard~~ GEOS-Chem ~~for isoprene oxidation products model~~ (Nguyen et al., 2015). As an expedient, Nguyen et al. (2015) scaled the Henry's law coefficients ~~to enable the for these species in GEOS-Chem to match their observed~~ deposition velocities ~~calculated by GEOS-Chem to match those measured at the Alabama SOAS site. We and we~~ follow their approach here. Other important depositing species include  $\text{HNO}_3$  and peroxyacetyl nitrate (PAN), with mean deposition velocities along the SEAC<sup>4</sup>RS Southeast US flight tracks in daytime of  $3.79 \text{ cm s}^{-1}$  and  $0.76 \text{ cm s}^{-1}$ , respectively.

## 2.3 Emissions

We use hourly US anthropogenic emissions from the 2011 EPA national emissions inventory (NEI11v1) at a horizontal resolution of  $0.1^\circ \times 0.1^\circ$  and adjusted to 2013 using national annual scaling factors (EPA, 2015). ~~The scaling factor for  $\text{NO}_x$~~

emissions is 0.89. Further information on the use of the NEI11v1 in GEOS-Chem can be found here: [http://wiki.seas.harvard.edu/geos-chem/index.php/EPA/NEI11\\_North\\_American\\_emissions/](http://wiki.seas.harvard.edu/geos-chem/index.php/EPA/NEI11_North_American_emissions/). The total national NO<sub>x</sub> emission in NEI11v1 for 2013 is 3.5 Tg N. Initial implementation of this inventory in GEOS-Chem resulted in a ~~60%an~~ overestimate of SEAC<sup>4</sup>RS DC-8 observations of 60% for NO<sub>x</sub> and 70% for HNO<sub>3</sub>, and a ~~71%an~~ overestimate of 71% for nitrate (NO<sub>3</sub>) wet deposition fluxes measured by the National Acid Deposition Program (NADP) across the Southeast US. This suggests that NEI11v1 NO<sub>x</sub> emissions are biased high. Errors in NO<sub>x</sub> sources from soils, wildfire, or lightning cannot account for the overestimate because their magnitudes are small relative to fuel combustion, as shown below.

Emissions from power plant stacks, which represent 12% of the NEI11v1 NO<sub>x</sub> emissions on an annual basis (EPA, 2015), are well constrained by continuous emission monitors. Other components of the NEI inventory are more uncertain. A number of studies have found that NEI emission estimates for mobile sources may be too high by a factor of two or more (Castellanos et al., 2011; Fujita et al., 2012; Brioude et al., 2013; Anderson et al., 2014). Lu et al. (2015) find good agreement between NEI emissions and top-down estimates from OMI NO<sub>2</sub>, but they assume an error on NEI emissions of 50%.

Here we reduce NEI11v1 NO<sub>x</sub> emissions (adjusted to 2013) by 60% (factor of 2.5) for all fuel combustion sources except power plants, ~~amounting to a reduction of 53% (factor of the annual 2.1) for total~~ NEI11v1 emissions. There is no information in the spatial pattern of bias that would warrant a more location-specific or source-specific reduction. The resulting US anthropogenic NO<sub>x</sub> emissions from fuel combustion for 2013 total 1.7 Tg N a<sup>-1</sup>. As shown in the next section, this reduction largely corrects the bias in the simulation of observations for NO<sub>x</sub> and its oxidation products. Soil NO<sub>x</sub> emissions, including emissions from fertilizer application, are computed according to Hudman et al. (2012), with a 50% reduction in the Midwest US based on a previous comparison with OMI NO<sub>2</sub> observations (Vinken et al., 2014). Open fire emissions are from the daily Quick Fire Emissions Database (QFED) (Darmenov and da Silva, 2014) with diurnal variability from the Western Regional Air Partnership (Air Sciences, 2005). We emit 40% of open fire NO<sub>x</sub> emissions as PAN and 20% as HNO<sub>3</sub> to account for fast oxidation taking place in the fresh plume (Alvarado et al., 2010). Following Fischer et al. (2014), we inject 35% of fire emissions above the boundary layer, evenly between 3.5 and 5.5 km altitude.

We constrain the lightning NO<sub>x</sub> source with satellite data as described by Murray et al. (2012). Lightning NO<sub>x</sub> is mainly released at the top of convective updrafts following Ott et al. (2010). ~~During SEAC<sup>4</sup>RS, we treat the lightning NO<sub>x</sub> yield in the Southeast as tropical (250 mol/flash) rather than midlatitudes (500 mol/flash) to be consistent with the tropical nature of convection during SEAC<sup>4</sup>RS (Toon et al., 2016), and to achieve unbiased upper tropospheric NO<sub>x</sub> and ozone profiles. The standard GEOS-Chem model uses higher NO<sub>x</sub> yields for mid-latitudes lightning (500 mol/flash) than for tropical (260 mol/flash) (Huntrieser et al., 2007, 2008; Hudman et al., 2007; Ott et al., 2010) with a fairly arbitrary boundary between the two at 23°N in North America and 35°N in Eurasia. Zhang et al. (2014) previously found that this leads GEOS-Chem to overestimate background ozone in the southwestern US and we find the same here for the eastern US and the Gulf of~~

Mexico. We treat here all lightning in the 35°S-35°N band as tropical and thus remove the distinction between North America and Eurasia.

Figure 1 gives the resulting surface NO<sub>x</sub> emissions for the Southeast US for August and September 2013. With the original NEI inventory, fuel combustion accounted for 81% of total surface NO<sub>x</sub> emissions in the Southeast US (not including lightning). After reducing NEI emissions, the contribution from fuel combustion is still 68%.

Biogenic VOC emissions are from MEGAN v2.1, including isoprene, acetone, acetaldehyde, monoterpenes, and >C<sub>2</sub> alkenes. We reduce MEGAN v2.1 isoprene emissions by 15% to better match SEAC<sup>4</sup>RS observations (Wolfe et al., 2015; Zhu et al., 2016). Yu et al. (2016) show the resulting isoprene emissions for the SEAC<sup>4</sup>RS period.

### **3 Constraints on Overestimate of NO<sub>x</sub> emissions from aircraft and observations in the EPA NEI inventory**

Figure 2 shows simulated and observed median vertical distributions of NO<sub>x</sub>, total inorganic nitrate (gas-phase HNO<sub>3</sub>+aerosol NO<sub>3</sub>), and ozone concentrations along the SEAC<sup>4</sup>RS flight tracks over the Southeast US. Here and elsewhere the data exclude urban plumes as diagnosed by [NO<sub>2</sub>] > 84 ppb, open fire plumes as diagnosed by [CH<sub>3</sub>CN] > 200 ppt, and stratospheric air as diagnosed by [O<sub>3</sub>]/[CO] > 1.25 mol mol<sup>-1</sup>. These filters exclude <1%, 67%, and 6% of the data respectively. We would not expect the model to be able to capture these features even at native resolution (Yu et al., 2016).

Model results in Figure 2 are shown both with the original NO<sub>x</sub> emissions (dashed line) and with non-power plant NEI combustion emissions decreased by 60% (solid line). Decreasing emissions corrects the model bias for NO<sub>x</sub> and also largely corrects the bias for inorganic nitrate. Boundary layer ozone is overestimated by 12 ppb with the original NO<sub>x</sub> emissions but this bias disappears after decreasing the NO<sub>x</sub> emissions.

Further support for decreasing NO<sub>x</sub> emissions is offered by observed nitrate wet deposition fluxes from the NADP network (NADP, 2007). Figure 3 compares simulated and observed fluxes for the model with decreased NO<sub>x</sub> emissions. Model values have been corrected for precipitation bias following the method of Paulot et al. (2014), in which the monthly deposition flux is assumed to scale to the 0.6<sup>th</sup> power of the precipitation bias. We diagnose precipitation bias in the GEOS-PP5.11.0 data relative to high-resolution PRISM observations (<http://prism.oregonstate.edu>). For the Southeast US, the precipitation bias is -34% in August and -21% in September 2013.

We see from Figure 3 that the model with decreased NO<sub>x</sub> emissions reproduces the spatial variability in the observations with minimal bias over the Southeast US domain shown in Figure 1 and across the US-rest of the country. In comparison, the model with original emissions had a 6063% overestimate of the nitrate wet deposition flux nationally and a 71%

overestimate in the Southeast. Thus the need to decrease NO<sub>x</sub> emissions relative to NEI applies to the whole US, not just the Southeast. The high deposition fluxes along the Gulf of Mexico, both in the model and in the observations, reflect particularly large precipitation.

5 | The model with decreased NO<sub>x</sub> emissions also ~~well~~ reproduces the spatial distribution of NO<sub>x</sub> in the Southeast US boundary layer as observed in SEAC<sup>4</sup>RS. This is shown in Figure 4 with simulated and observed concentrations of NO<sub>x</sub> along the flight tracks below 1.5 km altitude. The spatial correlation coefficient is 0.771. There is no indication of regional patterns of model bias that would point to the need for a more selective adjustment of NO<sub>x</sub> emissions. ~~Our simple approach of decreasing non power plant NEI anthropogenic emissions by 60% performs well.~~

10 | **4 ~~Constraints from Using~~ satellite NO<sub>2</sub> data: ~~importance of the~~ to verify NO<sub>x</sub> emissions: sensitivity to upper troposphere**

Observations of tropospheric NO<sub>2</sub> columns by solar backscatter from the OMI satellite instrument offer an additional constraint on NO<sub>x</sub> emissions (Duncan et al., 2014; Lu et al., 2015). We compare the tropospheric columns simulated by GEOS-Chem with the NASA operational retrieval (Level 2, v2.1) (NASA, 2012; Bucsele et al., 2013) and the Berkeley High-Resolution (BEHR) retrieval (Russell et al., 2011). The NASA retrieval has been validated to agree with surface measurements ~~to~~ within ± 20% (Lamsal et al., 2014). Both retrievals fit the observed backscattered solar spectra to obtain a slant tropospheric NO<sub>2</sub> column, Ω<sub>s</sub>, along the optical path of the backscattered radiation detected by the satellite. The slant column is converted to the vertical column, Ω<sub>v</sub>, by using an air mass factor (AMF) that depends on the vertical profile of NO<sub>2</sub> and on the scattering properties of the surface and the atmosphere (Palmer et al., 2001):

20 | 
$$\Omega_v = \frac{\Omega_s}{AMF} = \frac{\Omega_s}{AMF_G \int_0^{z_T} w(z)S(z)dz} \quad (4)$$

In Equation 4, AMF<sub>G</sub> is the geometric air mass factor that depends on ~~the~~ viewing geometry of the satellite, w(z) is a scattering weight calculated by a radiative transfer model that describes the sensitivity of the backscattered radiation to NO<sub>2</sub> as a function of altitude, S(z) is a shape factor describing the normalized vertical profile of NO<sub>2</sub> number density, and z<sub>T</sub> is the tropopause. Scattering weights for NO<sub>2</sub> retrievals typically increase by a factor of 3 ~~betweenfrom~~ the surface ~~andto~~ the upper troposphere (Martin et al., 2002). Here we use our GEOS-Chem shape factors to re-calculate the AMFs in the NASA and BEHR retrievals as recommended by Lamsal et al. (2014) for comparing model and observations. We filter out cloudy scenes (cloud radiance fraction > 0.5) and bright surfaces (surface reflectivity > 0.3).

30 | Figure 5 shows the mean NO<sub>2</sub> tropospheric columns from BEHR, NASA, and GEOS-Chem (with NO<sub>x</sub> emission reductions applied) over the Southeast US for August-September 2013. The BEHR retrieval is on average 6% higher than the NASA retrieval. GEOS-Chem is on average 11±19% lower than the NASA retrieval and 16±18% lower than the BEHR retrieval.



Without decreasing NEI NO<sub>x</sub> emissions, GEOS-Chem would be biased high against both retrievals by 26-31%. The low bias in the model with reduced NO<sub>x</sub> emissions does not appear to be caused by an overcorrection of surface emissions but rather ~~the effect of NO<sub>x</sub> in by~~ the upper troposphere, ~~as explained below.~~

5 ~~The tropospheric NO<sub>2</sub> columns over the Southeast US in Figure 5 are not solely determined by boundary layer NO<sub>x</sub>, but also include a large contribution from the free and upper troposphere.~~ Figure 6 (top left panel) shows the mean vertical profile of NO<sub>2</sub> number density as measured from the aircraft by two independent instruments (NOAA and UC Berkeley) and simulated by GEOS-Chem. The observations show a secondary maximum in the upper troposphere above 10 km, absent in GEOS-Chem. It has been suggested that aircraft measurements of NO<sub>2</sub> in the upper troposphere could be biased high due to decomposition in the instrument inlet of thermally unstable NO<sub>x</sub> reservoirs such as HNO<sub>4</sub> and methylperoxynitrate (Browne et al., 2011; Nault et al., 2015; Reed et al., ~~2015~~2016). This could possibly account for the difference between the NOAA and UC Berkeley measurements in the upper troposphere (Nault et al., 2015). ~~At the surface, the median difference is 1.8x10<sup>9</sup> molecules cm<sup>-3</sup> which is within the NOAA and UC Berkeley measurement uncertainties of +/- 0.030 ppbv + 7% and +/- 5%, respectively.~~

15 The middletop right panel of Figure 6 shows the cumulative contributions from different altitudes to the slant NO<sub>2</sub> column measured by the satellite, using the median vertical profiles from the left panel and applying mean altitude-dependent scattering weights from the NASA and BEHR retrievals. The boundary layer below 1.5 km contributes only 19-28% of the column. The upper troposphere above 8 km contributes 32-49% in the aircraft observations and 23% in GEOS-Chem. Much of the observed upper tropospheric NO<sub>2</sub> likely originates from lightning and is broadly distributed across the Southeast because of the long lifetime of NO<sub>x</sub> at that altitude (Li et al., 2005; Bertram et al., 2007; Hudman et al., 2007). The NO<sub>2</sub> vertical profile (shape factor) assumed in the BEHR retrieval does not include any lightning influence, and the Global Modeling Initiative (GMI) model vertical profile assumed in the NASA retrieval likely underestimates the upper tropospheric NO<sub>2</sub> similarly to GEOS-Chem in Figure 6. These underestimates of upper tropospheric NO<sub>2</sub> in the retrieval shape factors will cause a negative bias in the AMF and therefore a positive bias in the retrieved vertical columns. This could explain the lower GEOS-Chem column in Figure 5 as compared to the retrievals.

30 The GEOS-Chem underestimate of observed upper tropospheric NO<sub>2</sub> in Figure 6 ~~appears to beis partially~~ driven ~~in part~~ by NO/NO<sub>2</sub> partitioning. The rightbottom left panel of Figure 6 shows the [NO]/[NO<sub>2</sub>] concentration ratio in GEOS-Chem and in the observations (NOAA for NO, UC Berkeley for NO<sub>2</sub>). One would expect the [NO]/[NO<sub>2</sub>] concentration ratio in the daytime upper troposphere to be controlled by photochemical steady-state:

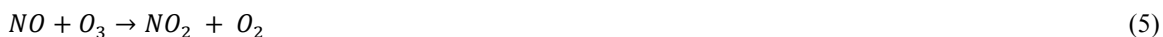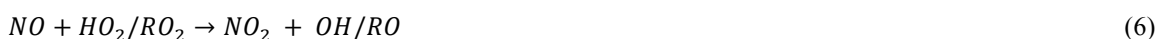

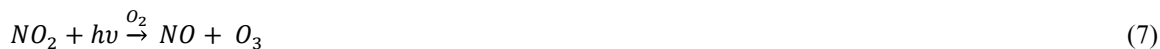

with reaction (6) playing only a minor role so that  $[NO]/[NO_2] \approx k_7/(k_5[O_3])$ , defining the NO-NO<sub>2</sub>-O<sub>3</sub> photochemical steady state (PSS). The PSS plotted in Figure 6 agrees closely with GEOS-Chem ~~with the relatively small differences due to reaction (6)~~. Such agreement has previously been found when comparing photochemical models with observed  $[NO]/[NO_2]$  ratios from aircraft in the marine upper troposphere (Schultz et al., 1999) and lower stratosphere (Del Negro et al., 1999). The SEAC<sup>4</sup>RS observations show large departure.

Zhu et al. (2016) found that GEOS-Chem underestimates the observed HCHO concentrations in the upper troposphere during SEAC<sup>4</sup>RS by a factor of 3, implying that the model underestimates the HO<sub>x</sub> source from convective injection of HCHO and peroxides (Prather and Jacob, 1997; Müller and Brasseur, 1999). HO<sub>2</sub> observations over the central US in summer during the SUCCESS aircraft campaign suggest that this convective injection increases HO<sub>x</sub> concentrations in the upper troposphere by a factor of 2 (Jaeglé et al., 1998). The bottom right panel of Figure 6 shows median modeled and observed vertical profiles of the HO<sub>x</sub> reservoir hydrogen peroxide (H<sub>2</sub>O<sub>2</sub>) during SEAC<sup>4</sup>RS over the Southeast US. GEOS-Chem underestimates observed H<sub>2</sub>O<sub>2</sub> by a mean factor of 1.7 above 8km. The middle right panel of Figure 6 shows the predicted  $[NO]/[NO_2]$  ratio if modeled convective injection of HO<sub>2</sub> and RO<sub>2</sub> precursors is underestimated by a factor of 2. While such an underestimate is insufficient to reconcile simulated and observed  $[NO]/[NO_2]$  concentration ratios, the contribution to the  $[NO]/[NO_2]$  ratio from Reaction 6 would be much more significant than previously estimated.

The PSS and GEOS-Chem simulation of the NO/NO<sub>2</sub> concentration ratio in Figure 6 use  $k_5 = 3.0 \times 10^{-12} \exp[-1500/T] \text{ cm}^3 \text{ molecule}^{-1} \text{ s}^{-1}$  and spectroscopic information for  $k_7$  from Sander et al. (2011). The NO<sub>2</sub> photolysis frequencies  $k_7$  computed locally by GEOS-Chem are on average within 10% of the values determined in SEAC<sup>4</sup>RS from measured actinic fluxes (Shetter and Muller, 1999). It is possible that the strong thermal dependence of  $k_5$  has some error, considering that only one direct measurement has been published for the cold temperatures of the upper troposphere (Borders and Birks, 1982). Cohen et al. (2000) found that reducing the activation energy of  $k_5$  by 15% improved model agreement in the lower stratosphere. Correcting the discrepancy between simulated and observed  $[NO]/[NO_2]$  ratios in the upper troposphere in Figure 6 would require a similar reduction to the activation energy of  $k_5$ , but this reduction would negatively impact the surface comparison. This inconsistency of the observed  $[NO]/[NO_2]$  ratio with basic theory needs to be resolved, as it affects the inference of NO<sub>x</sub> emissions from satellite NO<sub>2</sub> column measurements. Notwithstanding this inconsistency, ~~the result remains we find~~ that NO<sub>2</sub> in the upper troposphere makes a significant contribution to the tropospheric NO<sub>2</sub> column ~~and hence must be properly accounted for when interpreting the NO<sub>2</sub> columns in terms of NO<sub>x</sub> emissions observed from space.~~

## 5 Isoprene oxidation pathways

Measurements aboard the SEAC<sup>4</sup>RS aircraft included first-generation isoprene nitrates (ISOPN), isoprene hydroperoxide (ISOPOOH), and hydroperoxyaldehydes (~~HPALD~~HPALDs) (Crouse et al., 2006; Paulot et al., 2009a; St. Clair et al., 2010; Crouse et al., 2011; Beaver et al., 2012; Nguyen et al., 2015). The measurement uncertainties are large (30%, 40%, and 50%, respectively (Nguyen et al., 2015)). These are unique products of the ISOPO<sub>2</sub> + NO, ISOPO<sub>2</sub> + HO<sub>2</sub>, and ISOPO<sub>2</sub> isomerization pathways and thus track whether oxidation of isoprene proceeds by the high-NO<sub>x</sub> pathway (producing ozone) or the low-NO<sub>x</sub> pathways. Figure 2 (bottom row) compares simulated and observed concentrations. All three gases are restricted to the boundary layer because of their short lifetimes. Mean model concentrations in the lowest altitude bin (Figure 2, approximately 400m above ground) differ from observations by ~~+819%~~ for ISOPN and -50% for ~~HPALD~~HPALDs. The GEOS-Chem simulation of organic nitrates including ISOPN is further discussed in Fisher et al. (2016).

The bias for ~~HPALD~~HPALDs is within the uncertainty of the kinetics and measurement. Our HPALD source is based on the ISOPO<sub>2</sub> isomerization rate constant from Crouse et al. (2011). A theoretical calculation by Peeters et al. (2014) suggests a rate constant that is 1.8× higher, which would reduce the model bias for ~~HPALD~~HPALDs and ISOPOOH and increase boundary layer OH by 8%. GEOS-Chem overestimates ISOPOOH by 74% below 1.5 km. Recent work by St. Clair et al. (2015) found that the reaction rate of ISOPOOH + OH to form IEPOX is approximately 10% faster than the rate given by Paulot et al. (2009b), which would further reduce the model overestimate. It is likely that after these changes the GEOS-Chem overestimate of ISOPOOH would be within measurement uncertainty. For both ISOPOOH and ~~HPALD~~HPALDs, GEOS-Chem captures much of the spatial variability ( $r = 0.8$  and  $0.7$ , respectively).

Figure 7 shows the model branching ratios for the fate of the ISOPO<sub>2</sub> radical by tracking the mass of ISOPO<sub>2</sub> reacting via the high-NO<sub>x</sub> pathway (ISOPO<sub>2</sub>+NO) and the low-NO<sub>x</sub> pathways over the Southeast US domain. The mean branching ratios for the ~~mixed layer Southeast US~~ are ISOPO<sub>2</sub>+NO 54%, ISOPO<sub>2</sub>+HO<sub>2</sub> 26%, ISOPO<sub>2</sub> isomerization 15%, and ISOPO<sub>2</sub>+RO<sub>2</sub> 5%. ~~The lack of dominance of the high-NO<sub>x</sub> pathway accounts for less than 50% of the fate of isoprene for large areas of the Southeast US. This reflects is due~~ in part to the spatial segregation of isoprene and NO<sub>x</sub> emissions (Yu et al., 2016). This segregation also buffers the effect of changing NO<sub>x</sub> emissions on the fate of isoprene. Our original simulation with higher total NO<sub>x</sub> emissions (unadjusted NEI11v1) had a branching ratio for the ISOPO<sub>2</sub>+NO reaction of 62%, as compared to 54% in our standard simulation.

## 6 Implications for ozone: aircraft and ozonesonde observations

Figure 2 compares simulated and observed median vertical profiles of ozone concentrations over the Southeast US during SEAC<sup>4</sup>RS. There is no significant bias through the depth of the tropospheric column. The median ozone concentration below 1.5 km is 49 ppb in the observations and 51 ppb in the model. We also find excellent model agreement across the US with

the SEACIONS ozonesonde network (Figure 8). The successful simulation of ozone is contingent on the decrease in  $\text{NO}_x$  emissions relative to the NEI inventory. As shown in Figure 2, a simulation with the unadjusted NEI emissions overestimates boundary layer ozone by 12 ppb.

5 The model also has some success in reproducing the spatial variability of boundary layer ozone seen from the aircraft, as shown in Figure 4. The correlation coefficient is  $r = 0.771$  on the  $0.25^\circ \times 0.3125^\circ$  model grid, and patterns of high and low ozone concentration are consistent. The highest observed ozone ( $>75$  ppb) was found in air influenced by agricultural burning along the Mississippi River and by outflow from Houston over Louisiana. GEOS-Chem does not capture the extreme values and this probably reflects a dilution effect (Yu et al., 2016).

10

A critical parameter for understanding ozone production is the ozone production efficiency (OPE) (Liu et al., 1987), defined as the number of ozone molecules produced per molecule of  $\text{NO}_x$  emitted. This can be estimated from atmospheric observations by the relationship between odd oxygen ( $\text{O}_x \equiv \text{O}_3 + \text{NO}_2$ ) and the sum of products of  $\text{NO}_x$  oxidation, collectively called  $\text{NO}_z$  and including inorganic and organic nitrates (Trainer et al., 1993; Zaveri, 2003). The  $\text{O}_x$  vs.  $\text{NO}_z$  linear relationship (as derived from a linear regression) provides an upper estimate of the OPE because of rapid deposition of  $\text{NO}_y$ , mainly  $\text{HNO}_3$  (Trainer et al., 2000; Rickard et al., 2002).

15

Figure 9 shows the observed and simulated daytime (9-16 local)  $\text{O}_x$  vs.  $\text{NO}_z$  relationship in the SEAC<sup>4</sup>RS data below 1.5 km, where  $\text{NO}_z$  is derived from the observations as  $\text{NO}_y - \text{NO}_x \equiv \text{HNO}_3 + \text{aerosol nitrate} + \text{PAN} + \text{alkyl nitrates}$ . The resulting OPE from the observations ( $17.4 \pm 0.4 \text{ mol mol}^{-1}$ ) agrees well with GEOS-Chem ( $16.7 \pm 0.3$ ). Previous work during the INTEX-NA aircraft campaign in summer 2004 found an OPE of 8 below 4 km (Mena-Carrasco et al., 2007). By selecting INTEX-NA data only for the Southeast and below 1.5 km we find an OPE of  $14.1 \pm 1.1$  (Figure 9, right panel). The median  $\text{NO}_z$  was 1.1 ppb during SEAC<sup>4</sup>RS and 1.5 ppb during INTEX-NA, a decrease of approximately 40%. With the original NEI11v1  $\text{NO}_x$  emissions (53% higher), the OPE from GEOS-Chem would be  $14.7 \pm 0.3$ . Both the INTEX-NA data and the model are consistent with the expectation that OPE increases with decreasing  $\text{NO}_x$  emissions (Liu et al., 1987).

20

25

### 7 Implications for ozone: ~~aircraft and ozonesonde observations~~ surface air

Figure 10 compares maximum daily 8-h average (MDA8) ozone values at the US EPA Clean Air Status and Trends Network (CASTNET) sites in June-August 2013 to the corresponding GEOS-Chem values. The model has a mean positive bias of  $8 \pm 13 \pm 14$  ppb with no significant spatial pattern. The model is unable to match the low tail in the observations, including a significant population with MDA8 ozone less than 20 ppb.

30

The positive bias in the model for surface ozone is remarkable considering that the model is unbiased relative to aircraft observations below 1.5 km altitude (Figures 2 and 4). A standard explanation for model overestimates of surface ozone over the Southeast US, first proposed by Fiore et al. (2003) and echoed in the review by McDonald-Buller et al. (2011), is excessive ozone over the Gulf of Mexico, which is the prevailing low-altitude inflow. We find that this is not the case.

5 SEAC<sup>4</sup>RS included four flights over the Gulf of Mexico, and Figure 11 compares simulated and observed vertical profiles of ozone and NO<sub>x</sub> concentrations that show no systematic bias. The median ozone concentration in the marine boundary layer is 26 ppb in the observations and 29 ppb in the model. ~~The aircraft observations in Figure 4 also~~ This successful simulation is due to our adjustment of lightning NO<sub>x</sub> emission (Section 2.3); a sensitivity test with the original (twice higher) GEOS-Chem lightning emissions in the southern US increases surface ozone over the Gulf of Mexico by up to 6 ppb. The aircraft  
10 observations in Figure 4 show no indication of a coastal depletion that might be associated with halogen chemistry. Remarkably, the median ozone over the Gulf of Mexico is higher than approximately 8% of MDA8 values at sites in the Southeast.

~~Median ozone concentrations over the Southeast are 49 ppb in the aircraft observations below 1.5 km (Figure 2) and MDA8 ozone is 40 ppb at CASTNET sites. This indicates a large vertical gradient near the surface that GEOS-Chem does not capture. In GEOS-Chem, air rapidly mixes vertically in the unstable mixed layer, which typically extended to 1.5 km altitude along SEAC<sup>4</sup>RS flight tracks as indicated by aerosol lidar (Zhu et al., 2016). Inspection of the low tail of MDA8 ozone values below 20 ppb at the CASTNET sites indicates that these are associated with colder than average conditions, likely corresponding to low clouds or rain. This supports vertical mixing as a factor responsible for the large gradient between~~  
15 ~~ozone observations at surface sites and from the aircraft.~~

~~Further support for a vertical gradient of ozone near the surface, even under midday conditions, is offered by the ozonesonde observations from the SEACIONS network. Figure 12 shows the median ozonesonde profile~~ It appears instead that there is a model bias in boundary layer vertical mixing and chemical production. Figure 12 shows the median ozonesonde profile at a  
25 higher vertical resolution over the Southeast US (Huntsville, Alabama and St. Louis, Missouri sites) during SEAC<sup>4</sup>RS as compared to GEOS-Chem below 1.5 km. ~~The model shows minimal gradient below 1.5 km with a small increase in ozone in the lowest model layer.~~ The ozonesondes indicate a decrease of 7 ppb from 1.5 km to ~~0.2 km (the lowest altitude reported).~~ The surface, whereas GEOS-Chem ~~representation~~ features a reverse gradient of mixed layer dynamics is fairly standard for CTMs and thus we suggest increasing ozone from 1.5 to 1 km with flat concentrations below. Preliminary inspection  
30 suggests that ~~excessive~~ this may reflect excessively dry conditions in the GEOS-5.11.0 meteorological fields, promoting boundary layer production and vertical mixing ~~could contribute to the model overestimates of ozone in the Southeast US reported by the literature. More work is needed to evaluate and improve the representation of mixed layer dynamics in CTMs. Such a bias might not be detected in the aircraft data, collected mainly under fair weather conditions.~~

## 8 Conclusions

We used aircraft (SEAC<sup>4</sup>RS), surface, satellite, and ozonesonde observations from August and September 2013, interpreted with the GEOS-Chem chemical transport model, to better understand the factors controlling surface ozone in the Southeast US. Models tend to overestimate ozone in that region. Determining the reasons behind this overestimate is critical to the design of efficient emission control strategies to meet the ozone NAAQS.

A major finding from this work is that the EPA National Emission Inventory (NEI11v1) for NO<sub>x</sub> (the limiting precursor for ozone formation) is biased high ~~by 50% on across the national scale~~ US by as much as a factor of 2. Evidence for this comes from (1) SEAC<sup>4</sup>RS observations of NO<sub>x</sub> and its oxidation products, (2) NADP network observations of nitrate wet deposition fluxes, and (3) OMI satellite observations of NO<sub>2</sub>. Presuming no error in emissions from large power plants with continuous emission monitors (12% of unadjusted NEI inventory), we ~~conclude~~ suggest that emissions from other industrial sources and mobile sources must be decreased by ~~60%~~ a factor of 2.5 from NEI values. We estimate that anthropogenic NO<sub>x</sub> emissions in the US in 2013 were 1.7 Tg N a<sup>-1</sup>, ~~and that fuel combustion still accounts for 68% of surface NO<sub>x</sub> emissions in the Southeast US in summer. The rest is mainly from soils.~~

~~Our analysis of the~~ OMI NO<sub>2</sub> satellite data over the Southeast US ~~reveals that the~~ are consistent with this downward correction of NO<sub>x</sub> emissions but interpretation is complicated by the large contribution of the free troposphere ~~makes a dominant contribution~~ to the NO<sub>2</sub> tropospheric column retrieved from the satellite. ~~This reflects in part high upper tropospheric NO<sub>2</sub> observed from the~~ Observed (aircraft, accounting for 32-49) and simulated vertical profiles indicate that NO<sub>2</sub> below 2 km contributes only 20-35% of the tropospheric column detected from space while NO<sub>2</sub> above 8 km seen by the satellite. Upper tropospheric NO<sub>2</sub> will increase in importance if surface emissions continue to decline in the future. 8 km (mainly from lightning) contributes 25-50%. Current retrievals of satellite NO<sub>2</sub> data do not properly account for this elevated pool of upper tropospheric NO<sub>2</sub>, so that the reported tropospheric NO<sub>2</sub> columns are biased high. ~~The upper tropospheric NO<sub>2</sub> in the aircraft observations requires better understanding because it is associated with a large departure from conventional NO-NO<sub>2</sub>-O<sub>3</sub> photochemical steady state~~ More work is needed on the chemistry maintaining high levels of NO<sub>2</sub> in the upper troposphere.

~~Atmospheric oxidation of biogenic isoprene (Isoprene emitted by vegetation is the dominant~~ main VOC precursor of summertime ozone in the Southeast) ~~can proceed by either~~ in summer, but we find that only 50% reacts by the high-NO<sub>x</sub> pathway (where the isoprene peroxy radical ISOP<sub>2</sub> reacts with NO, producing to produce ozone) or low-NO<sub>x</sub> pathways (where ISOP<sub>2</sub> reacts with other peroxy radicals or isomerizes, not producing ozone). Measurements. This is consistent with detailed aircraft observations of isoprene oxidation products from each pathway were made aboard the SEAC<sup>4</sup>RS aircraft and these are reproduced within measurement and kinetic uncertainty by GEOS-Chem. In GEOS-Chem, only half of

isoprene over the Southeast US reacts by the high-NO<sub>x</sub> pathway, and this the aircraft. The high-NO<sub>x</sub> fraction is only weakly sensitive to the magnitude of NO<sub>x</sub> emissions because isoprene and NO<sub>x</sub> emissions are spatially segregated. Thus it is likely that decreasing NO<sub>x</sub> emissions to meet the latest ozone NAAQS will not lead to fundamental changes in the properly describe high- and low-NO<sub>x</sub> pathways for isoprene chemistry. Oxidation is critical for simulating ozone and it appears that the GEOS-Chem mechanism is successful for this purpose.

Our updated GEOS-Chem simulation with decreased NO<sub>x</sub> emissions as described above provides an unbiased simulation of boundary layer and free tropospheric ozone measured from aircraft and ozonesondes during SEAC<sup>4</sup>RS. Decreasing NO<sub>x</sub> emissions is critical to this success as the original model with NEI emissions overestimated boundary layer ozone by 12 ppb. The ozone production efficiency (OPE) inferred from O<sub>3</sub> vs. NO<sub>z</sub> aircraft correlations in the mixed layer is also well reproduced. Comparison to the INTEX-NA aircraft observations over the Southeast in summer 2004 indicates a 14% increase in OPE associated with a 40% reduction in NO<sub>x</sub> emissions.

Despite the unbiased simulation of boundary layer ozone, GEOS-Chem overestimates MDA8 surface ozone observations in the Southeast US in summer by  $8 \pm 13 \pm 14$  ppb. This appears to be due to excessive vertical mixing. Midday Daytime ozonesonde data over the Southeast US during SEAC<sup>4</sup>RS indicate a 7 ppb decrease in ozone from 1.5 km to 0.2 km altitude whereas the model shows no such decrease. The surface that GEOS-Chem assumes efficient vertical mixing does not capture. This may be due to excessively dry conditions in the unstable mixed layer, as is standard GEOS meteorological data used to drive GEOS-Chem, resulting in models, but the observations indicate less efficient mixing. It appears that excessive boundary layer mixing, combined with excessive NO<sub>x</sub> emissions, could be responsible for the general ozone production and mixing. Such a bias found in models in simulating surface ozone in the Southeast US may not be detected in the aircraft data, generally collected under fair-weather conditions. Investigating this source of bias and its prevalence across models will be the topic of a follow-up paper.

## Acknowledgements

We are grateful to the entire NASA SEAC<sup>4</sup>RS team for their help in the field. We thank Tom Ryerson for his measurements of NO and NO<sub>2</sub> from the NOAA NO<sub>y</sub>O<sub>3</sub> instrument. We thank L. Gregory Huey for the use of his CIMS PAN measurements. We thank Fabien Paulot and Jingqiu Mao for their helpful discussions of isoprene chemistry. We thank Christoph Keller for his help in implementing the NEI11v1 emissions into GEOS-Chem. We acknowledge the EPA for providing the 2011 North American emission inventory, and in particular George Pouliot for his help and advice. These emission inventories are intended for research purposes. A technical report describing the 2011-modeling platform can be found at: [http://www.epa.gov/ttn/chief/net/2011nei/2011\\_nei\\_tsdv1\\_draft2\\_june2014.pdf](http://www.epa.gov/ttn/chief/net/2011nei/2011_nei_tsdv1_draft2_june2014.pdf). A description of the 2011 NEI can be found at: <http://www.epa.gov/ttnchie1/net/2011inventory.html>. This work was supported by the NASA Earth Science

Division and by STAR Fellowship Assistance Agreement no. 91761601-0 awarded by the US Environmental Protection Agency (EPA). It has not been formally reviewed by EPA. The views expressed in this publication are solely those of the authors. JAF acknowledges support from a University of Wollongong Vice Chancellor's Postdoctoral Fellowship. This research was undertaken with the assistance of resources provided at the NCI National Facility systems at the Australian National University through the National Computational Merit Allocation Scheme supported by the Australian Government.

## References

- Air Sciences, I.: 2002 Fire Emission Inventory for the WRAP Region - Phase II, Western Governors Association/Western Regional Air Partnership, 2005.
- Alvarado, M. J., Logan, J. A., Mao, J., Apel, E., Riemer, D., Blake, D., Cohen, R. C., Min, K. E., Perring, A. E., Browne, E. C., Wooldridge, P. J., Diskin, G. S., Sachse, G. W., Fuelberg, H., Sessions, W. R., Harrigan, D. L., Huey, G., Liao, J., Case-Hanks, A., Jimenez, J. L., Cubison, M. J., Vay, S. A., Weinheimer, A. J., Knapp, D. J., Montzka, D. D., Flocke, F. M., Pollack, I. B., Wennberg, P. O., Kurten, A., Crounse, J., Clair, J. M. S., Wisthaler, A., Mikoviny, T., Yantosca, R. M., Carouge, C. C., and Le Sager, P.: Nitrogen oxides and PAN in plumes from boreal fires during ARCTAS-B and their impact on ozone: an integrated analysis of aircraft and satellite observations, *Atmos. Chem. Phys.*, 10, 9739-9760, doi:10.5194/acp-10-9739-2010, 2010.
- Anderson, D. C., Loughner, C. P., Diskin, G., Weinheimer, A., Canty, T., P., Salawitch, R. J., Worden, H. M., Fried, A., Mikoviny, T., Wisthaler, A., and Dickerson, R. R.: Measured and modeled CO and NO<sub>y</sub> in DISCOVER-AQ: An evaluation of emissions and chemistry over the eastern US, *Atmos. Environ.*, 96, 78-87, doi:10.1016/j.atmosenv.2014.07.004, 2014.
- Bates, K. H., Crounse, J. D., St Clair, J. M., Bennett, N. B., Nguyen, T. B., Seinfeld, J. H., Stoltz, B. M., and Wennberg, P. O.: Gas Phase Production and Loss of Isoprene Epoxydiols, *J. Phys. Chem.-US A*, 118, 1237-1246, doi: 10.1021/Jp4107958, 2014.
- Beaver, M. R., St. Clair, J. M., Paulot, F., Spencer, K. M., Crounse, J. D., LaFranchi, B. W., Min, K. E., Pusede, S. E., Wooldridge, P. J., Schade, G. W., Park, C., Cohen, R. C., and Wennberg, P. O.: Importance of biogenic precursors to the budget of organic nitrates: observations of multifunctional organic nitrates by CIMS and TD-LIF during BEARPEX 2009, *Atmos. Chem. Phys.*, 12, 5773-5785, 2012.
- Bertram, T. H., Perring, A. E., Wooldridge, P. J., Crounse, J. D., Kwan, A. J., Wennberg, P. O., Scheuer, E., Dibb, J., Avery, M., Sachse, G., Vay, S. A., Crawford, J. H., McNaughton, C. S., Clarke, A., Pickering, K. E., Fuelberg, H., Huey, G., Blake, D. R., Singh, H. B., Hall, S. R., Shetter, R. E., Fried, A., Heikes, B. G., and Cohen, R. C.: Direct Measurements of the Convective Recycling of the Upper Troposphere, *Science*, 315, doi:10.1126/science.1134548, 2007.



- Bey, I., Jacob, D. J., Yantosca, R. M., Logan, J. A., Field, B. D., Fiore, A. M., Li, Q. B., Liu, H. G. Y., Mickley, L. J., and Schultz, M. G.: Global modeling of tropospheric chemistry with assimilated meteorology: Model description and evaluation, *J. Geophys. Res.-Atmos*, 106, 23073-23095, doi:10.1029/2001jd000807, 2001.
- Borders, R. A., and Birks, J. W.: High-Precision Measurements of Activation Energies over Small Temperature Intervals: Curvature in the Arrhenius Plot for the Reaction  $\text{NO} + \text{O}_3 \rightarrow \text{NO}_2 + \text{O}_2$ , *J. Phys. Chem.-US*, 86, 3295-3302, 1982.
- Brioude, J., Angevine, W. M., Ahmadov, R., Kim, S. W., Evan, S., McKeen, S. A., Hsie, E. Y., Frost, G. J., Neuman, J. A., Pollack, I. B., Peischl, J., Ryerson, T. B., Holloway, J., Brown, S. S., Nowak, J. B., Roberts, J. M., Wofsy, S. C., Santoni, G. W., Oda, T., and Trainer, M.: Top-down estimate of surface flux in the Los Angeles Basin using a mesoscale inverse modeling technique: assessing anthropogenic emissions of CO, NO<sub>x</sub> and CO<sub>2</sub> and their impacts, *Atmos. Chem. Phys.*, 13, 3661-3677, doi:10.5194/acp-13-3661-2013, 2013.
- Brown-Steiner, B., Hess, P. G., and Lin, M. Y.: On the capabilities and limitations of GCM simulations of summertime regional air quality: A diagnostic analysis of ozone and temperature simulations in the US using CESM CAM-Chem, *Atmos. Environ.*, 101, 134-148, doi:10.1016/j.atmosenv.2014.11.001, 2015.
- Browne, E. C., Perring, A. E., Wooldridge, P. J., Apel, E., Hall, S. R., Huey, L. G., Mao, J., Spencer, K. M., Clair, J. M. S., Weinheimer, A. J., Wisthaler, A., and Cohen, R. C.: Global and regional effects of the photochemistry of CH<sub>3</sub>O<sub>2</sub>NO<sub>2</sub>: evidence from ARCTAS, *Atmos. Chem. Phys.*, 11, 4209-4219, doi:10.5194/acp-11-4209-2011, 2011.
- Brunner, D., Staehelin, J., Jeker, D., Wernli, H., and Schumann, U.: Nitrogen oxides and ozone in the tropopause region of the Northern Hemisphere: Measurements from commercial aircraft in 1996/1996 and 1997, *J. Geophys. Res.*, 106, 27,673-627,699, 2001.
- Bucsela, E. J., Krotkov, N. A., Celarier, E. A., Lamsal, L. N., Swartz, W. H., Bhartia, P. K., Boersma, K. F., Veefkind, J. P., Gleason, J. F., and Pickering, K. E.: A new stratospheric and tropospheric NO<sub>2</sub> retrieval algorithm for nadir-viewing satellite instruments: applications to OMI, *Atmospheric Measurement Techniques*, 6, 2607-2626, doi:10.5194/amt-6-2607-2013, 2013.
- Canty, T. P., Hembeck, L., Vinciguerra, T. P., Anderson, D. C., Goldberg, D. L., Carpenter, S. F., Allen, D. J., Loughner, C. P., Salawitch, R. J., and Dickerson, R. R.: Ozone and NO<sub>x</sub> chemistry in the eastern US: evaluation of CMAQ/CB05 with satellite (OMI) data, *Atmos. Chem. Phys.*, 15, 10965-10982, doi:10.5194/acp-15-10965-2015, 2015.
- Carpenter, L. J., Clemishaw, K. C., Burgess, R. A., Penkett, S. A., Cape, J. N., and McFadyen, G. G.: Investigation and evaluation of the NO<sub>x</sub>/O<sub>3</sub> photochemical steady state, *Atmos. Environ.*, 32, 3353-3365, 1998.
- [Castellanos, P., Marufu, L. T., Doddridge, B. G., Taubman, B. F., Schwab, J. J., Hains, J. C., Ehrman, S. H., Dickerson, R. R.: Ozone, oxides of nitrogen, and carbon monoxide during pollution events over the eastern United States: An evaluation of emissions and vertical mixing, \*J. Geophys. Res.\*, 116, D16307, doi:10.1029/2010JD014540, 2011.](#)
- Chen, D., Wang, Y. X., McElroy, M. B., He, K., Yantosca, R. M., and Le Sager, P.: Regional CO pollution in China simulated by the high-resolution nested-grid GEOS-Chem model, *Atmos. Chem. Phys.*, 9, 3825-3839, 2009.

- Cohen, R. C., Perkins, K. K., Koch, L. C., Stimpfle, R. M., Wennberg, P. O., Hanisco, T. F., Lanzendorf, E. J., Bonne, G. P., Voss, P. B., Salawitch, R. J., Del Negro, L. A., Wilson, J. C., McElroy, C. T., and Bui, T. P.: Quantitative constraints on the atmospheric chemistry of nitrogen oxides: An analysis along chemical coordinates, *J. Geophys. Res.*, 105, 24,283-224,304, 2000.
- 5 Crounse, J. D., McKinney, K. A., Kwan, A. J., and Wennberg, P. O.: Measurement of gas-phase hydroperoxides by chemical ionization mass spectrometry (CIMS), *Anal. Chem.*, 78, 6726-6732, 2006.
- Crounse, J. D., Paulot, F., Kjaergaard, H. G., and Wennberg, P. O.: Peroxy radical isomerization in the oxidation of isoprene, *Phys. Chem. Chem. Phys.*, 13, 13607-13613, doi:10.1039/c1cp21330j, 2011.
- Darmenov, A. S., and da Silva, A.: The Quick Fire Emissions Dataset (QFED) Documentatino of versions 2.1, 2.2 and 2.4,  
10 NASA, 2014.
- Dibb, J. E., Talbot, R. W., Scheuer, E. M., Seid, G., Avery, M., A., and Singh, H. B.: Aerosol chemical composition in Asian continental outflow during the TRACE-P campaign: Comparison with PEM-West B, *J. Geophys. Res.*, 108, doi:10.1029/2002jd003111, 2003.
- Del Negro, L. A., Fahey, D. W., Gao, R. S., Donnelly, S. G., Keim, E. R., Neuman, J. A., Cohen, R. C., Perkins, K. K.,  
15 Koch, L. C., Salawitch, R. J., Lloyd, S. A., Proffitt, M. H., Margitan, J. J., Stimpfle, R. M., Bonne, G. P., Voss, P. B., Wennberg, P. O., McElroy, C. T., Swartz, W. H., Kusterer, T. L., Anderson, D. E., Lait, L. R., and Bui, T. P.: Comparison of modeled and observed values of NO<sub>2</sub> and JNO<sub>2</sub> during the Photochemistry of Ozone Loss in the Arctic Region in Summer (POLARIS) mission, *J. Geophys. Res.*, 104, 26687, doi:10.1029/1999jd900246, 1999.
- Duncan, B. N., Prados, A. I., Lamsal, L. N., Liu, Y., Streets, D. G., Gupta, P., Hilsenrath, E., Kahn, R. A., Nielsen, J. E.,  
20 Beyersdorf, A. J., Burton, S. P., Fiore, A. M., Fishman, J., Henze, D. K., Hostetler, C. A., Krotkov, N. A., Lee, P., Lin, M., Pawson, S., Pfister, G., Pickering, K. E., Pierce, R. B., Yoshida, Y., and Ziemba, L. D.: Satellite data of atmospheric pollution for U.S. air quality applications: Examples of applications, summary of data end-user resources, answers to FAQs, and common mistakes to avoid, *Atmos. Environ.*, 94, 647-662, doi:10.1016/j.atmosenv.2014.05.061, 2014.
- 25 EPA: Integrated Science Assessment for Ozone and Related Photochemical Oxidatns, U.S. Environmental Protection Agency, Research Triangle Park, NC, 2013.
- National Emissions Inventory (NEI) Air Pollutant Emission Trends Data: <http://www.epa.gov/ttn/chieftrends/index.html>, 2015.
- Finkelstein, P. L., Ellestad, T. G., Clarke, J. F., Meyers, T. P., Schwede, D. B., Hebert, E. O., and Neal, J. A.: Ozone and  
30 sulfur dioxide dry deposition to forests: Observations and model evaluation, *J. Geophys. Res.-Atmos*, 105, 15365-15377, doi:10.1029/2000jd900185, 2000.
- Fiore, A. M., Jacob, D. J., Liu, H., Yantosca, R. M., Fairlie, T. D., and Li, Q.: Variability in surface ozone background over the United States: Implications for air quality policy, *J. Geophys. Res.-Atmos*, 108, doi:10.1029/2003jd003855, 2003.

- Fiore, A. M., Horowitz, L. W., Purves, D. W., Levy, H., Evans, M. J., Wang, Y., Li, Q., and Yantosca, R.: Evaluating the contribution of changes in isoprene emissions to surface ozone trends over the eastern United States, *J. Geophys. Res.*, 110, doi:10.1029/2004jd005485, 2005.
- 5 Fiore, A. M., Dentener, F. J., Wild, O., Cuvelier, C., Schultz, M. G., Hess, P., Textor, C., Schulz, M., Doherty, R. M., Horowitz, L. W., MacKenzie, I. A., Sanderson, M. G., Shindell, D. T., Stevenson, D. S., Szopa, S., Van Dingenen, R., Zeng, G., Atherton, C., Bergmann, D., Bey, I., Carmichael, G., Collins, W. J., Duncan, B. N., Faluvegi, G., Folberth, G., Gauss, M., Gong, S., Hauglustaine, D., Holloway, T., Isaksen, I. S. A., Jacob, D. J., Jonson, J. E., Kaminski, J. W., Keating, T. J., Lupu, A., Marmer, E., Montanaro, V., Park, R. J., Pitari, G., Pringle, K. J., Pyle, J. A., Schroeder, S., Vivanco, M. G., Wind, P., Wojcik, G., Wu, S., and Zuber, A.: Multimodel estimates of intercontinental source-receptor relationships for ozone pollution, *J. Geophys. Res.*, 114, doi:10.1029/2008jd010816, 2009.
- 10 Fischer, E. V., Jacob, D. J., Yantosca, R. M., Sulprizio, M. P., Millet, D. B., Mao, J., Paulot, F., Singh, H. B., Roiger, A., Ries, L., Talbot, R. W., Dzepina, K., and Deolal, S. P.: Atmospheric peroxyacetyl nitrate (PAN): a global budget and source attribution, *Atmos. Chem. Phys.*, 14, 2679-2698, 2014.
- 15 Fisher, J. A., Jacob, D. D., Travis, K. R., Kim, P. S., Marais, E., Miller, C. C., Yu, K., Zhu, L., Yantosca, R. M., Sulprizio, M. P., Mao, J., Wennberg, P. O., Crouse, J. D., Teng, A. P., Nguyen, T. B., St Clair, J. M., Romer, P., Nault, B. A., Wooldridge, P. J., Jimenez, J. L., Campuzano-Jost, P., Day, D. A., Shepson, P. B., Xiong, F., Blake, D. R., Goldstein, A. H., Misztal, P. K., Hanisco, T. F., Wolfe, G. M., Ryerson, T. B., Wisthaler, A., and Mikoviny, T.: Organic nitrate chemistry and its implications for nitrogen budgets in an isoprene- and monoterpene-rich atmosphere: constrains from aircraft (SEAC4RS) and ground-based (SOAS) observations in the Southeast US, *Atmos. Chem. Phys.*, 6, 5969-5991, doi:10.5194/acp-16-5969-2016, 2016.
- 20 Fujita, E. M., Campbell, D. E., Zielinska, B., Chow, J. C., Lindhjem, C. E., DenBleyker, A., Bishop, G. A., Schuchmann, B. G., Stedman, D. H., and Lawson, D. R.: Comparison of the MOVES2010a, MOBILE6.2, and EMFAC2007 mobile source emission models with on-road traffic tunnel and remote sensing measurements, *J. Air Waste Manage.*, 62, 1134-1149, doi:10.1080/10962247.2012.699016, 2012.
- 25 [Holtslag, A., and Boville, B.: Local versus nonlocal boundary-layer diffusion in a global climate model, \*J. Climate\*, 6, 1825, 1993.](#)
- Horowitz, L. W., Fiore, A. M., Milly, G. P., Cohen, R. C., Perring, A., Wooldridge, P. J., Hess, P. G., Emmons, L. K., and Lamarque, J. F.: Observational constraints on the chemistry of isoprene nitrates over the eastern United States, *J. Geophys. Res.-Atmos*, 112, doi:10.1029/2006jd007747, 2007.
- 30 Hudman, R. C., Jacob, D. J., Turquety, S., Leibensperger, E. M., Murray, L. T., Wu, S., Gilliland, A. B., Avery, M., Bertram, T. H., Brune, W., Cohen, R. C., Dibb, J. E., Flocke, F. M., Fried, A., Holloway, J., Neuman, J. A., Orville, R., Perring, A., Ren, X., Sachse, G. W., Singh, H. B., Swanson, A., and Wooldridge, P. J.: Surface and lightning

sources of nitrogen oxides over the United States: Magnitudes, chemical evolution, and outflow, *J. Geophys. Res.*, 112, doi:10.1029/2006jd007912, 2007.

Hudman, R. C., Moore, N. E., Mebust, A. K., Martin, R. V., Russell, A. R., Valin, L. C., and Cohen, R. C.: Steps towards a mechanistic model of global soil nitric oxide emissions: implementation and space based-constraints, *Atmos. Chem. Phys.*, 12, 7779-7795, doi:10.5194/acp-12-7779-2012, 2012.

[Huntrieser, H., Schlager, H., Roiger, A., Lichtenstern, M., Schumann, U., Kurz, C., Brunner, D., Schwierz, C., Richter, A., and Stohl, A.: Lightning-produced NO<sub>x</sub> over Brazil during TROC-CINOX: airborne measurements in tropical and subtropical thunderstorms and the importance of mesoscale convective systems, \*Atmos. Chem. Phys.\*, 7, 2987-3013, doi:10.5194/acp-7-2987-2007, 2007.](#)

[Huntrieser, H., Schumann, U., Schlager, H., Höller, H., Giez, A., Betz, H.-D., Brunner, D., Forster, C., Pinto Jr., O., and Calheiros, R.: Lightning activity in Brazilian thunderstorms during TROCCINOX: implications for NO<sub>x</sub> production, \*Atmos. Chem. Phys.\*, 8, 921-953, doi:10.5194/acp-8-921-2008, 2008.](#)

Jacobs, M. I., Burke, W. J., and Elrod, M. J.: Kinetics of the reactions of isoprene-derived hydroxynitrates: gas phase epoxide formation and solution phase hydrolysis, *Atmos. Chem. Phys.*, 14, 8933-8946, doi:10.5194/acp-14-8933-2014, 2014.

[Jaeglé, L., Jacob, D. J., Wang, Y., Weinheimer, A. J., Ridley, B. A., Campos, T. L., Sachse, G. W., Hagen, D. E.: Sources and chemistry of NO<sub>x</sub> in the upper troposphere over the United States, \*Geophys. Res. Lett.\* 25\(10\), 1705-1708, 1998.](#)

Kim, P. S., Jacob, D. J., Fisher, J. A., Travis, K., Yu, K., Zhu, L., Yantosca, R. M., Sulprizio, M. P., Jimenez, J. L., Campuzano-Jost, P., Froyd, K. D., Liao, J., Hair, J. W., Fenn, M. A., Butler, C. F., Wagner, N. L., Gordon, T. D., Welti, A., Wennberg, P. O., Crouse, J. D., St. Clair, J. M., Teng, A. P., Millet, D. B., Schwarz, J. P., Markovic, M. Z., and Perring, A. E.: Sources, seasonality, and trends of Southeast US aerosol: an integrated analysis of surface, aircraft, and satellite observations with the GEOS-Chem chemical transport model, *Atmos. Chem. Phys.*, 15, 10411-10433, doi:10.5194/acp-15-10411-2015, 2015.

Lamsal, L. N., Krotkov, N. A., Celarier, E. A., Swartz, W. H., Pickering, K. E., Bucsela, E. J., Gleason, J. F., Martin, R. V., Philip, S., Irie, H., Cede, A., Herman, J., Weinheimer, A., Szykman, J. J., and Knepp, T. N.: Evaluation of OMI operational standard NO<sub>2</sub> column retrievals using in situ and surface-based NO<sub>2</sub> observations, *Atmos. Chem. Phys.*, 14, 11587-11609, doi:10.5194/acp-14-11587-2014, 2014.

Li, Q., Jacob, D. J., Park, R., Wang, Y., Heald, C. L., Hudman, R., Yantosca, R. M.: North American pollution outflow and the trapping of convectively lifted pollution by upper-level anticyclone, *J. Geophys. Res.*, 110, doi:10.1029/2004JD005039, 2005.

Li, X., Rohrer, F., Hofzumahaus, A., Brauers, T., Haseler, R., Bohn, B., Broch, S., Fuchs, H., Gomm, S., Holland, F., Jäger, J., Kaiser, J., Keutsch, F. N., Lohse, I., Lu, K., Tillmann, R., Wegener, R., Wolfe, G. M., Mentel, T. F., Kiendler-Scharr, A., and Wahner, A.: Missing gas-phase source of HONO inferred from Zeppelin measurements in the troposphere, *Science*, 344, 292-296, doi:10.1126/science.1248999, 2014.

- Lin, J., Youn, D., Liang, X., and Wuebbles, D.: Global model simulation of summertime U.S. ozone diurnal cycle and its sensitivity to PBL mixing, spatial resolution, and emissions, *Atmos. Environ.*, 42, 8470-8483, doi:10.1016/j.atmosenv.2008.08.012, 2008.
- Lin, J.-T., and McElroy, M. B.: Impacts of boundary layer mixing on pollutant vertical profiles in the lower troposphere: Implications to satellite remote sensing, *Atmos. Environ.*, 44, 1726-1739, doi:10.1016/j.atmosenv.2010.02.009, 2010.
- Liu, S. C., Trainer, M., Fehsenfeld, F. C., Parrish, D. D., Williams, E. J., Fahey, D. W., Hubler, G., and Murphy, P. C.: Ozone Production in the Rural Troposphere and the Implications for Regional and Global Ozone Distributions, *J. Geophys. Res.*, 92, 4191-4207, 1987.
- Liu, Y. J., Herdinger-Blatt, I., McKinney, K. A., and Martin, S. T.: Production of methyl vinyl ketone and methacrolein via the hydroperoxyl pathway of isoprene oxidation, *Atmos. Chem. Phys.*, 13, 5715-5730, doi:10.5194/acp-13-5715-2013, 2013.
- Lu, Z., Streets, D. G., de Foy, B., Lamsal, L. N., Duncan, B. N., and Xing, J.: Emissions of nitrogen oxides from US urban areas: estimation from Ozone Monitoring Instrument retrievals for 2005–2014, *Atmos. Chem. Phys.*, 15, 10367-10383, doi:10.5194/acp-15-10367-2015, 2015.
- Mao, J., Jacob, D. J., Evans, M. J., Olson, J. R., Ren, X., Brune, W. H., Clair, J. M. S., Crouse, J. D., Spencer, K. M., Beaver, M. R., Wennberg, P. O., Cubison, M. J., Jimenez, J. L., Fried, A., Weibring, P., Walega, J. G., Hall, S. R., Weinheimer, A. J., Cohen, R. C., Chen, G., Crawford, J. H., McNaughton, C., Clarke, A. D., Jaeglé, L., Fisher, J. A., Yantosca, R. M., Le Sager, P., and Carouge, C.: Chemistry of hydrogen oxide radicals ( $\text{HO}_x$ ) in the Arctic troposphere in spring, *Atmos. Chem. Phys.*, 10, 5823-5838, doi:10.5194/acp-10-5823-2010, 2010.
- Mao, J., Paulot, F., Jacob, D. J., Cohen, R. C., Crouse, J. D., Wennberg, P. O., Keller, C. A., Hudman, R. C., Barkley, M. P., and Horowitz, L. W.: Ozone and organic nitrates over the eastern United States: Sensitivity to isoprene chemistry, *J. Geophys. Res.: Atmospheres*, 118, 11,256-211,268, doi:10.1002/jgrd.50817, 2013.
- Marais, E. A., Jacob, D. J., Jimenez, J. L., Campuzano-Jost, P., Day, D. A., Hu, W., Krechmer, J., Zhu, L., Kim, P. S., Miller, C. C., Fisher, J. A., Travis, K., Yu, K., Hanisco, T. F., Wolfe, G. M., Arkinson, H. L., Pye, H. O. T., Froyd, K. D., Liao, J., and McNeil, F. V.: Aqueous-phase mechanism for secondary organic aerosol formation from isoprene: application to the Southeast United States and co-benefit of  $\text{SO}_2$  emission controls, *Atmos. Chem. Phys.*, 16, 1603-1618, doi:10.5194/acp-16-1603-2016, 2016.
- Martin, R. V., Chance, K., Jacob, D. J., Kurosu, T. P., Spurr, R. J. D., Bucsela, E., Gleason, J. F., Palmer, P. I., Bey, I., Fiore, A. M., Li, Q., Yantosca, R. M., and Koелеmeijer, R. B. A.: An improved retrieval of tropospheric nitrogen dioxide from GOME, *J. Geophys. Res.*, 107, doi:10.1029/2001jd001027, 2002.
- McDonald-Buller, E. C., Allen, D. T., Brown, N., Jacob, D. J., Jaffe, D., Kolb, C. E., Lefohn, A. S., Oltmans, S., Parrish, D. D., Yarwood, G., and Zhang, L.: Establishing policy relevant background (PRB) ozone concentrations in the United States, *Envir. Sci. Tech.*, 45, 9484-9497, doi:10.1021/es2022818, 2011.

- Mena-Carrasco, M., Tang, Y., Carmichael, G. R., Chai, T., Thongbongchoo, N., Campbell, J. E., Kulkarni, S., Horowitz, L., Vukovich, J., Avery, M., Brune, W., Dibb, J. E., Emmons, L., Flocke, F., Sachse, G. W., Tan, D., Shetter, R., Talbot, R. W., Streets, D. G., Frost, G., and Blake, D.: Improving regional ozone modeling through systematic evaluation of errors using the aircraft observations during the International Consortium for Atmospheric Research on Transport and Transformation, *J. Geophys. Res.*, 112, doi:10.1029/2006jd007762, 2007.
- 5 [Müller, J. F. and Brasseur, G.: Sources of upper tropospheric HO<sub>x</sub>: A three-dimensional study, \*J. Geophys. Res.\*, 104, 1705-1715, 1999.](#)
- Murray, L. T., Jacob, D. J., Logan, J. A., Hudman, R. C., and Koshak, W. J.: Optimized regional and interannual variability of lightning in a global chemical transport model constrained by LIS/OTD satellite data, *J. Geophys. Res.*, 117, doi:10.1029/2012jd017934, 2012.
- 10 NADP: National Atmospheric Deposition Program (NRSP-3) in: Illinois State Water Survey, edited by: Office, N. P., 2204 Griffith Dr., Champaign, IL 61820., 2007.
- NASA, U. G.: OMI/Aura Level 2 Nitrogen Dioxide (NO<sub>2</sub>) Trace Gas Column Data 1-Orbit subset Swath along CloudSat track 1-Orbit Swath 13x24 km, version 003 in, edited by: Center, N. G. S. F., 2012.
- 15 Nault, B. A., Garland, C., Pusede, S. E., Wooldridge, P. J., Ullmann, K., Hall, S. R., and Cohen, R. C.: Measurements of CH<sub>3</sub>O<sub>2</sub>NO<sub>2</sub> in the upper troposphere, *Atmospheric Measurement Techniques*, 8, 987-997, doi:10.5194/amt-8-987-2015, 2015.
- Nguyen, T. B., Crounse, J. D., Teng, A. P., St Clair, J. M., Paulot, F., Wolfe, G. M., and Wennberg, P. O.: Rapid deposition of oxidized biogenic compounds to a temperate forest, *P. Natl. Acad. Sci USA*, 112, E392-401, doi:10.1073/pnas.1418702112, 2015.
- 20 Ott, L. E., Pickering, K. E., Stenchikov, G. L., Allen, D. J., DeCaria, A. J., Ridley, B., Lin, R.-F., Lang, S., and Tao, W.-K.: Production of lightning NO<sub>x</sub> and its vertical distribution calculated from three-dimensional cloud-scale chemical transport model simulations, *J. Geophys. Res.*, 115, doi:10.1029/2009jd011880, 2010.
- Palmer, P. I., Jacob, D. J., Chance, K., Martin, R. V., Spurr, R. J. D., Kurosu, T. P., Bey, I., Yantosca, R., Fiore, A., and Li, Q.: Air mass factor formulation for spectroscopic measurements from satellites: Application to formaldehyde retrievals from the Global Ozone Monitoring Experiment, *J. Geophys. Res.*, 106, 14539, doi: 10.1029/2000jd900772, 2001.
- 25 Paulot, F., Crounse, J. D., Kjaergaard, H. G., Kroll, J. H., Seinfeld, J. H., and Wennberg, P. O.: Isoprene photooxidation: new insights into the production of acids and organic nitrates, *Atmos. Chem. Phys.*, 9, 1479-1501, 2009a.
- 30 Paulot, F., Crounse, J. D., Kjaergaard, H. G., Kurten, A., St Clair, J. M., Seinfeld, J. H., and Wennberg, P. O.: Unexpected Epoxide Formation in the Gas-Phase Photooxidation of Isoprene, *Science*, 325, 730-733, doi: 10.1126/Science.1172910, 2009b.
- Paulot, F., Jacob, D. J., Pinder, R. W., Bash, J. O., Travis, K., and Henze, D. K.: Ammonia emissions in the United States, European Union, and China derived by high-resolution inversion of ammonium wet deposition data: Interpretation

- with a new agricultural emissions inventory (MASAGE\_NH3), *J. Geophys. Res.: Atmospheres*, 119, 4343-4364, doi:10.1002/2013jd021130, 2014.
- Peeters, J., Nguyen, T. L., and Vereecken, L.: HO<sub>x</sub> radical regeneration in the oxidation of isoprene, *Phys. Chem. Chem. Phys.*, 11, 5935-5939, doi:10.1039/b908511d, 2009.
- 5 Peeters, J., and Müller, J. F.: HO(x) radical regeneration in isoprene oxidation via peroxy radical isomerisations. II: experimental evidence and global impact, *Phys. Chem. Chem. Phys.*, 12, 14227-14235, doi:10.1039/c0cp00811g, 2010.
- Peeters, J., Müller, J. F., Stavrou, T., and Nguyen, V. S.: Hydroxyl radical recycling in isoprene oxidation driven by hydrogen bonding and hydrogen tunneling: the upgraded LIM1 mechanism, *J. Phys. Chem.-US. A*, 118, 8625-8643, doi:10.1021/jp5033146, 2014.
- 10 Pollack, I. B., Lerner, B. M., and Ryerson, T. B.: Evaluation of ultraviolet light-emitting diodes for detection of atmospheric NO<sub>2</sub> by photolysis – chemiluminescence, *J. Atmos. Chem.*, 65(2), 111-125, doi:10.1007/s10874-011-9184-3, 2010.
- [Prather, M.J., and D.J. Jacob, A persistent imbalance in HO<sub>x</sub> and NO<sub>x</sub> photochemistry of the upper troposphere driven by deep tropical convection, \*Geophys. Res. Lett.\*, 24, 3189-3192, 1997.](#)
- 15 Reed, C., Evans, M. J., Di Carlo, P., Lee, J. D., and Carpenter, L. J.: Interferences in photolytic NO<sub>2</sub> measurements: explanation for an apparent missing oxidant?, *Atmos. Chem. Phys.*, 16, 4707-4724, doi:10.5194/acp-16-4707-2016, 2016.
- Reidmiller, D. R., Fiore, A. M., Jaffe, D. A., Bergmann, D., Cuvelier, C., Dentener, F. J., Duncan, B. N., Folberth, G., Gauss, M., Gong, S., Hess, P., Jonson, J. E., Keating, T., Lupu, A., Marmer, E., Park, R., Schultz, M. G., Shindell, D. T., Szopa, S., Vivanco, M. G., Wild, O., and Zuber, A.: The influence of foreign vs. North American emissions on surface ozone in the US, *Atmos. Chem. Phys.*, 9, 5027-5042, 2009.
- 20 Rickard, A. R., Salisbury, G., Monks, P. S., Lewis, A. C., Baugitte, S., Bandy, B. J., Clemitshaw, K. C., and Penkett, S. A.: Comparison of Measured Ozone Production Efficiencies in the Marine Boundary Layer at Two European Coastal Sites under Different Pollution Regimes, *J. Atmos. Chem.*, 43, 107-134, 2002.
- 25 Russell, A. R., Perring, A. E., Valin, L. C., Bucsela, E. J., Browne, E. C., Wooldridge, P. J., and Cohen, R. C.: A high spatial resolution retrieval of NO<sub>2</sub> column densities from OMI: method and evaluation, *Atmos. Chem. Phys.*, 11, 8543-8554, doi:10.5194/acp-11-8543-2011, 2011.
- Russell, A. R., Valin, L. C., and Cohen, R. C.: Trends in OMI NO<sub>2</sub> observations over the United States: effects of emission control technology and the economic recession, *Atmos. Chem. Phys.*, 12, 12197-12209, doi:10.5194/acp-12-12197-2012, 2012.
- 30 Ryerson, T. B., Williams, E. J., and Fehsenfeld, F. C.: An efficient photolysis system for fast-response NO<sub>2</sub> measurements, *J. Geophys. Res.*, 105, 26447, doi:10.1029/2000jd900389, 2000.

- Ryerson, T. B., Buhr, M. P., Frost, G. J., Goldan, P. D., Holloway, J. S., Hübler, G., Jobson, B. T., Kuster, W. C., McKeen, S. A., Parrish, D. D., Roberts, J. M., Sueper, D. T., Trainer, M., Williams, J. and Fehsenfeld, F. C.: Emissions lifetimes and ozone formation in power plant plumes, *J. Geophys. Res.*, 103(D17), 22569-22583, 1998.
- Sander, S. P., Abbatt, J., Barker, J. R., Burkholder, J. B., Friedl, R. R., Golden, D. M., Huie, R. E., Kolb, C. E., Kurylo, M. J., Moortgat, G. K., Orkin, V. L., and Wine, P. H.: Chemical Kinetics and Photochemical Data for Use in Atmospheric Studies, Evaluation No. 17, in, JPL Publication 10-6, Jet Propulsion Laboratory, Pasadena, 2011.
- Schultz, M. G., Jacob, D. J., Wang, Y., Logan, J. A., Atlas, E. L., Blake, D. R., Blake, N. J., Bradshaw, J. D., Browell, E. V., Fenn, M. A., Flocke, F., Gregory, G. L., Heikes, B. G., Sachse, G. W., Sandholm, S. T., Shetter, R. E., Singh, H. B., and Talbot, R. W.: On the origin of tropospheric ozone and NO<sub>x</sub> over the tropical South Pacific, *J. Geophys. Res.*, 104, 5829, doi:10.1029/98jd02309, 1999.
- Shetter, R. E., and Muller, M.: Photolysis frequency measurements using actinic flux spectroradiometry during the PEM-Tropics mission: Instrumentation description and some results, *J. Geophys. Res.*, 104, 5647-5661, doi:10.1029/98JD01381, 1999.
- Singh, H. B., Brune, W. H., Crawford, J. H., Jacob, D. J., and Russell, P. B.: Overview of the summer 2004 Intercontinental Chemical Transport Experiment–North America (INTEX-A), *J. Geophys. Res.*, 111, doi:10.1029/2006jd007905, 2006.
- Squire, O. J., Archibald, A. T., Griffiths, P. T., Jenkin, M. E., Smith, D., and Pyle, J. A.: Influence of isoprene chemical mechanism on modelled changes in tropospheric ozone due to climate and land use over the 21st century, *Atmos. Chem. Phys.*, 15, 5123-5143, doi:10.5194/acp-15-5123-2015, 2015.
- St. Clair, J. M., Rivera-Rios, J. C., Crouse, J. D., Knap, H. C., Bates, K. H., Teng, A. P., Jorgensen, S., Kjaergaard, H. G., Keutsch, F. N., and Wennberg, P. O.: Kinetics and Products of the Reaction of the First-Generation Isoprene Hydroxy Hydroperoxide (ISOPOOH) with OH, *J. Phys. Chem.-US. A*, doi:10.1021/acs.jpca.5b06532, 2015.
- St. Clair, J. M., McCabe, D. C., Crouse, J. D., Steiner, U., and Wennberg, P. O.: Chemical ionization tandem mass spectrometer for the in situ measurement of methyl hydrogen peroxide, *Rev. Sci. Instrum.*, 81, doi:10.1063/1.3480552, 2010.
- Stavrakou, T., Peeters, J., and Müller, J. F.: Improved global modelling of HO<sub>x</sub> recycling in isoprene oxidation: evaluation against the GABRIEL and INTEX-A aircraft campaign measurements, *Atmos. Chem. Phys.*, 10, 9863-9878, doi:10.5194/acp-10-9863-2010, 2010.
- Toon, O. B., Maring, H., Dibb, J., Ferrare, R., Jacob, D. J., Jensen, E. J., Luo, Z. J., Mace, G. G., Pan, L. L., Pfister, L., Rosenlof, K. H., Redemann, J., Reid, J. S., Singh, H. B., Yokelson, R. J., Minnis, P., Chen, G., Jucks, K. W., and Pszenny, A.: Planning, implementation, and scientific goals of the Studies of Emissions and Atmospheric Composition, Clouds, and Climate Coupling by Regional Surveys (SEAC4RS) field mission, *J. Geophys. Res.*, in review, 2016.



- Trainer, M., Parrish, D. D., Buhr, M. P., Norton, R. B., Fehsenfeld, F. C., Anlauf, K. G., Bottenheim, J. W., Tang, Y. Z., Wiebe, H. A., Roberts, J. M., Tanner, R. L., Newman, L., Bowersox, C., Meagher, J. F., Olszyna, K. J., Rodgers, M. O., Wang, T., Berresheim, H., Demerjian, K. L., and Roychowdhury, U. K.: Correlation of ozone with NO<sub>y</sub> in photochemically aged air, *J. Geophys. Res.*, 98, 2917-2925, 1993.
- 5 Trainer, M., Parrish, D. D., Goldan, P. D., Roberts, J., and Fehsenfeld, F. C.: Review of observation-based analysis of the regional factors influencing ozone concentrations, *Atmos. Environ.*, 34, 2045-2061, 2000.
- Vinken, G. C. M., Boersma, K. F., Maasakkers, J. D., Adon, M., and Martin, R. V.: Worldwide biogenic soil NO<sub>x</sub> emissions inferred from OMI NO<sub>2</sub> observations, *Atmos. Chem. Phys.*, 14, 10363-10381, doi:10.5194/acp-14-10363-2014, 2014.
- 10 Walker, T. W.: Applications of Adjoint Modeling in Chemical Composition: Studies of Tropospheric Ozone at Middle and High Northern Latitudes, Graduate Department of Physics, University of Toronto, 2014.
- Wang, Y., Jacob, D. J., and Logan, J. A.: Global simulation of tropospheric O<sub>3</sub>-NO<sub>x</sub>-hydrocarbon chemistry, 1. Model formulation, *J. Geophys. Res.*, 103, 10,727-710,755, 1998.
- Wesely, M. L.: Parameterization of Surface Resistances to Gaseous Dry Deposition in Regional-Scale Numerical-Models, 15 *Atmos. Environ.*, 23, 1293-1304, doi:10.1016/0004-6981(89)90153-4, 1989.
- Wolfe, G. M., Crouse, J. D., Parrish, J. D., St Clair, J. M., Beaver, M. R., Paulot, F., Yoon, T. P., Wennberg, P. O., and Keutsch, F. N.: Photolysis, OH reactivity and ozone reactivity of a proxy for isoprene-derived hydroperoxyenals (HPALDs), *Phys. Chem. Chem. Phys.*, 14, 7276-7286, doi:10.1039/c2cp40388a, 2012.
- Wolfe, G. M., Hanisco, T. F., Arkinson, H. L., Bui, T. P., Crouse, J. D., Dean-Day, J., Goldstein, A., Guenther, A., Hall, S. 20 R., Huey, G., Jacob, D. J., Karl, T., Kim, P. S., Liu, X., Marvin, M. R., Mikoviny, T., Misztal, P. K., Nguyen, T. B., Peischl, J., Pollack, I., Ryerson, T., St. Clair, J. M., Teng, A., Travis, K. R., Ullman, K., Wennberg, P. O., and Wisthaler, A.: Quantifying Sources and Sinks of Reactive Gases in the Lower Atmosphere using Airborne Flux Observations, *Geophys. Res. Lett.*, 42, 8231-8240, doi:10.1002/2015GL065839, 2015.
- Xie, Y., Paulot, F., Carter, W. P. L., Nolte, C. G., Luecken, D. J., Hutzell, W. T., Wennberg, P. O., Cohen, R. C., and Pinder, 25 R. W.: Understanding the impact of recent advances in isoprene photooxidation on simulations of regional air quality, *Atmos. Chem. Phys.*, 13, 8439-8455, doi:10.5194/acp-13-8439-2013, 2013.
- Yu, K., Jacob, D. J., Fisher, J. A., Kim, P. S., Marais, E. A., Miller, C. C., Travis, K. R., Zhu, L., Yantosca, R. M., Sulprizio, M. P., Cohen, R. C., Dibb, J. E., Fried, A., Mikoviny, T., Ryerson, T. B., Wennberg, P. O., and Wisthaler, A.: Sensitivity to grid resolution in the ability of a chemical transport model to simulate observed oxidant chemistry 30 under high-isoprene conditions, *Atmos. Chem. Phys.*, 16, 4369-4378, doi:10.5194/acp-16-4369-2016, 2016.
- Zaveri, R. A.: Ozone production efficiency and NO<sub>x</sub> depletion in an urban plume: Interpretation of field observations and implications for evaluating O<sub>3</sub>-NO<sub>x</sub>-VOC sensitivity, *J. Geophys. Res.*, 108, doi:10.1029/2002jd003144, 2003.
- [Zhang, L., Jacob, D. J., Yue, X., Downey, N. V., Wood, D. A., Blewitt, D., Sources contributing to background surface ozone in the US Intermountain West, \*Atmos. Chem. Phys.\*, 14, 5295-5309, doi:10.5194/acp-14-5295-2014, 2014.](#)

Zhou, X., Ye, C., Pu, D., Stutz, J., Festa, J., Spolaor, M., Weinheimer, A. J., Campos, T. L., Haggerty, J. A., Cantrell, C. A., Mauldin, L., Guenther, A. B., Hornbrook, R. S., Apel, E. C., and Jensen, J. B.: Tropospheric HONO Distribution and Chemistry in the Southeastern US, American Geophysical Union, Fall Meeting 2014, 2014.

5     Zhu, L., Jacob, D. J., Mickley, L. J., Kim, P. S., Fisher, J. A., Travis, K. R., Yu, K., Yantosca, R. M., Sulprizio, M. P., Fried, A., Hanisco, T., Wolfe, G., Abad, G. G., Chance, K., De Smedt, I., and Yang, K.: Observing atmospheric formaldehyde (HCHO) from space: validation and intercomparison of six retrievals from four satellites (OMI, GOME2A, GOME2B, OMPS) with SEAC<sup>4</sup>RS aircraft observations over the Southeast US, Atmos. Chem. Phys. Discussions, doi:10.5194/acp-2016-162, 2016.

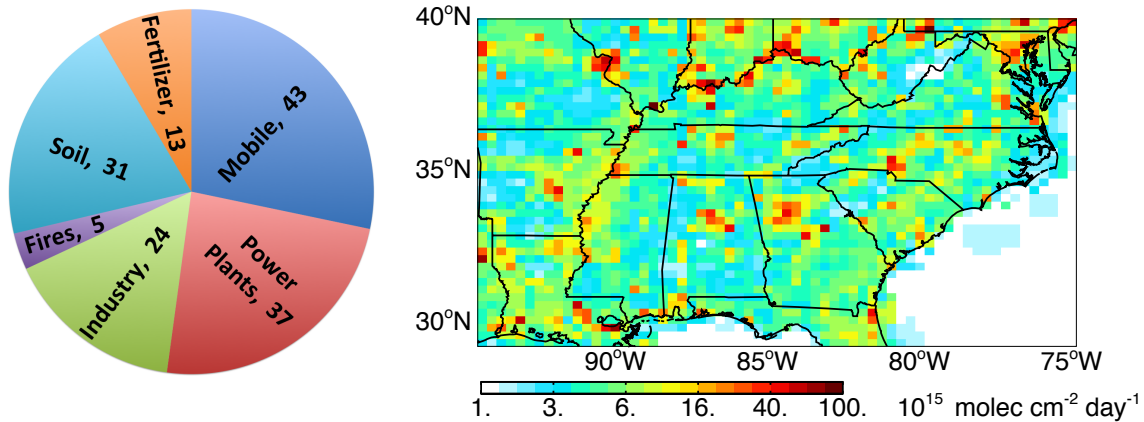

10

**Figure 1:** Surface NO<sub>x</sub> emissions in the Southeast US in GEOS-Chem for August and September 2013 including fuel combustion, soils, fertilizer use, and open fires (total emissions=153 Gg N). Anthropogenic emissions from mobile sources and industry in the National Emission Inventory (NEI11v1) for 2013 have been decreased by 60% to match atmospheric observations (see text). Lightning contributes an additional 25 Gg N to the free troposphere. (not included in the Figure). The emissions are mapped on the 0.25° × 0.3125° GEOS-Chem grid. The pie chart gives the sum of August-September 2013 emissions (Gg N) over the Southeast US domain as shown on the map, ~~and defined as (94.5 to 75° W and 29.5 to 40° N).~~

15

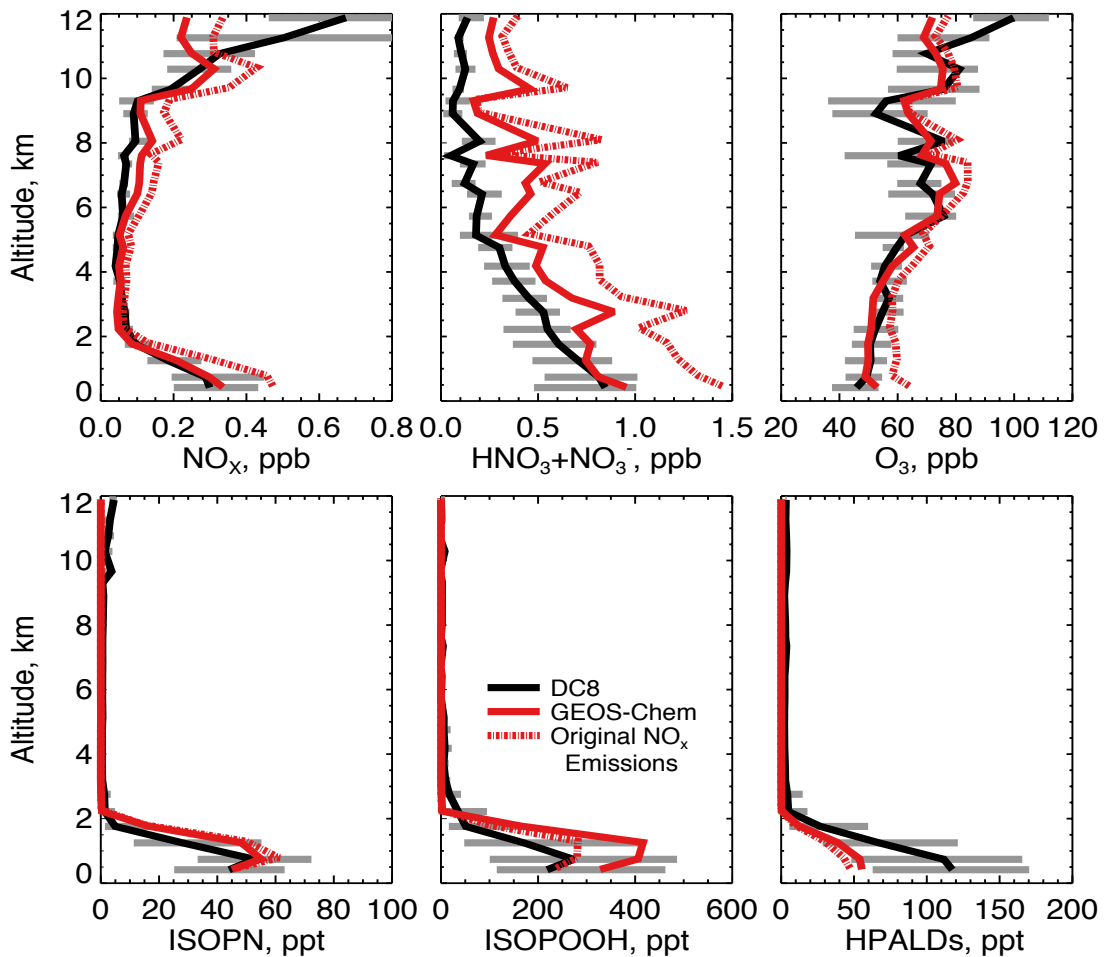

**Figure 2:** Median vertical concentration profiles of  $\text{NO}_x$ , total inorganic nitrate (gas  $\text{HNO}_3$ + aerosol  $\text{NO}_3^-$ ), ozone, isoprene nitrate (ISOPN), isoprene hydroperoxide (ISOPOOH), and hydroperoxyaldehydes (HPALDs) for the SEAC<sup>4</sup>RS flights over the Southeast US (domain of Figure 1). Observations from the DC-8 aircraft are compared to GEOS-Chem model results. The dashed red line shows model results before sealing adjustment of  $\text{NO}_x$  emissions from fuel combustion and lightning- (see text). The 25<sup>th</sup> and 75<sup>th</sup> percentiles of the DC-8 observations are shown as grey bars. The SEAC<sup>4</sup>RS observations have been filtered to remove open fire plumes, stratospheric air, and urban plumes as described in the text. Model results are sampled along the flight tracks at the time of flights and gridded to the model resolution. Profiles are binned to the nearest 0.5 km. The NOAA  $\text{NO}_y\text{O}_3$  4-channel chemiluminescence (CL) instrument made measurements of ozone and  $\text{NO}_y$  (Ryerson et al., 1998), NO (Ryerson et al., 2000) and  $\text{NO}_2$  (Pollack et al., 2010). Total inorganic nitrate was measured by the University of New Hampshire Soluble Acidic Gases and Aerosol (UNH SAGA) instrument (Dibb et al., 2003) and was mainly gas-phase  $\text{HNO}_3$  for the SEAC<sup>4</sup>RS conditions. ISOPOOH, ISOPN, and HPALDs were measured by the Caltech single mass analyzer CIMS (Crouse et al., 2006; Paulot et al., 2009a; Crouse et al., 2011).

Nitrate wet deposition fluxes, Aug-Sep 2013

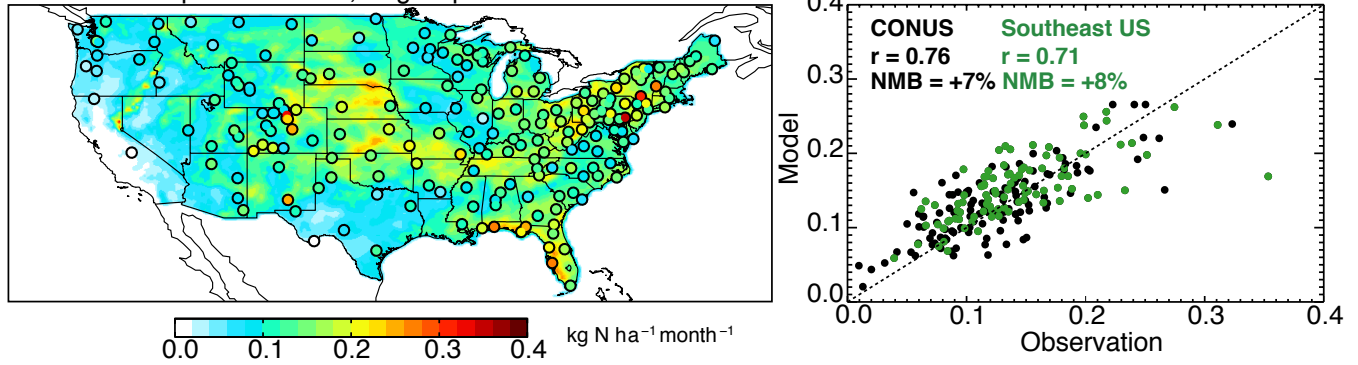

**Figure 3:** Nitrate wet deposition fluxes across the US in August-September 2013. Observations Mean observations from the NADP network (circles in the left panel) are compared to model values with decreased  $\text{NO}_x$  emissions (background). Also shown is a scatterplot of simulated versus observed values at individual sites for the whole contiguous US (black) and for the Southeast US (green). The correlation coefficient ( $r$ ) and normalized mean bias (NMB) are shown inset, along with the 1:1 line.

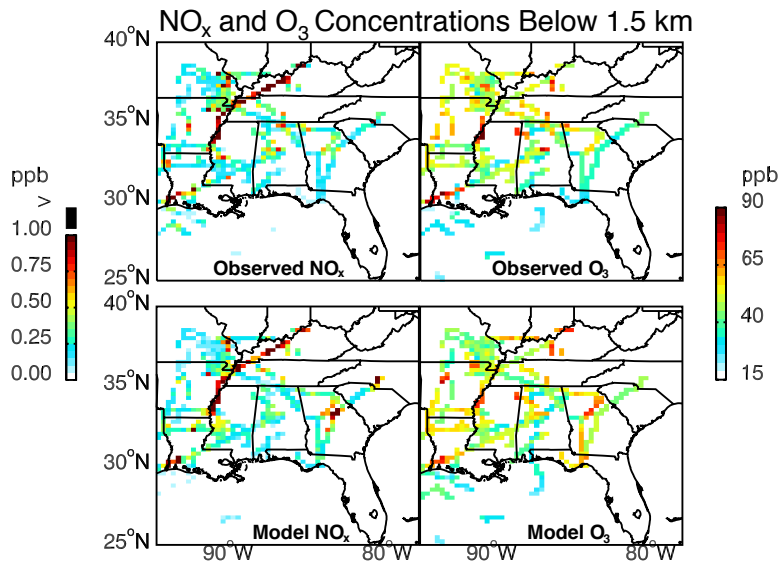

**Figure 4:** Ozone and  $\text{NO}_x$  concentrations in the boundary layer (0-1.5km) during SEAC<sup>4</sup>RS (6 Aug to 23 Sep 2013). Observations from the aircraft and simulated values are averaged over the  $0.25^\circ \times 0.3125^\circ$  GEOS-Chem grid.  $\text{NO}_x$  above 1ppb is shown in black. The spatial correlation coefficient is 0.71 for both  $\text{NO}_x$  and  $\text{O}_3$ . The normalized mean bias is -11.5% for  $\text{NO}_x$  and 4.5% for  $\text{O}_3$ .

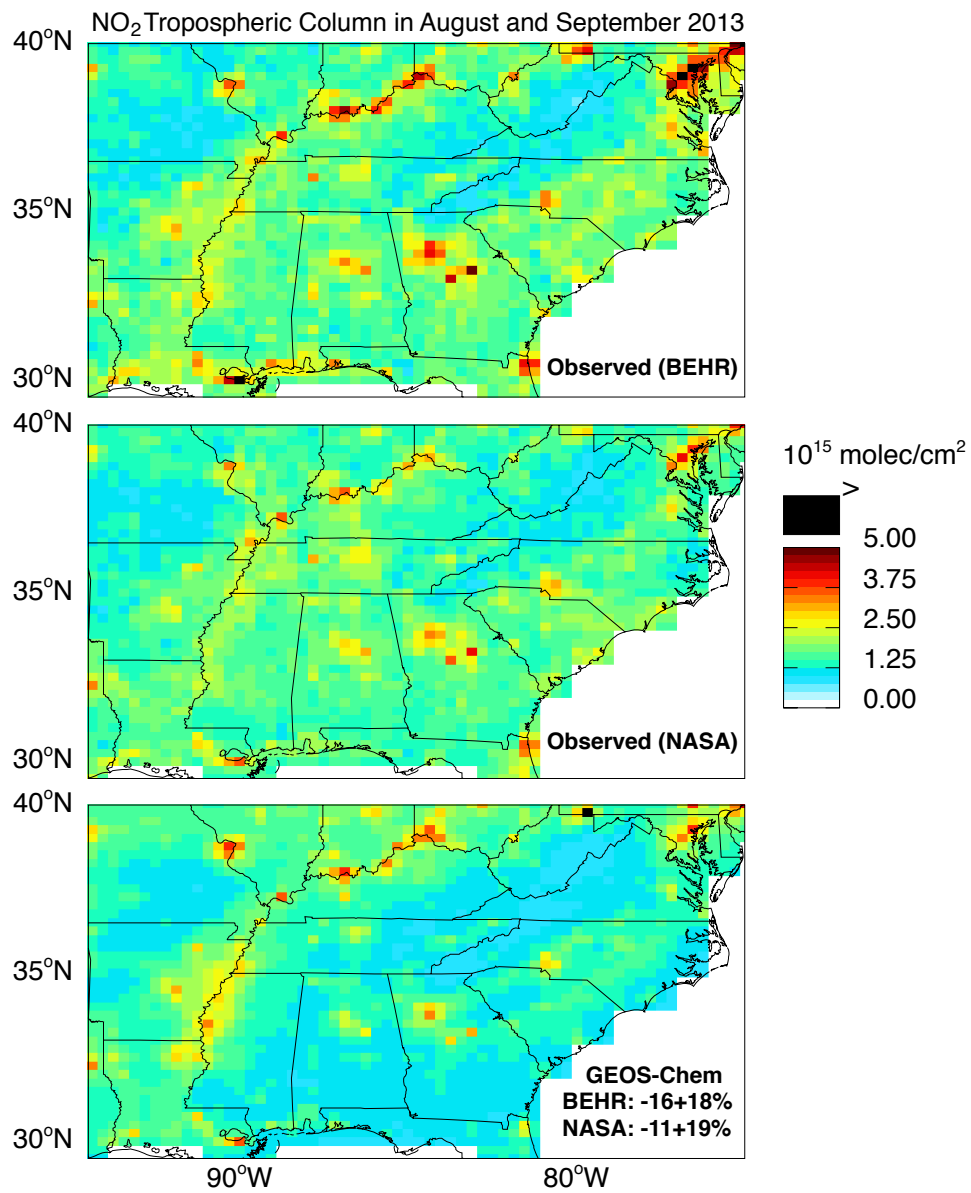

5 **Figure 5:** NO<sub>2</sub> tropospheric columns over the Southeast US in August-September 2013. GEOS-Chem (sampled at the 13:30 local time overpass of OMI) is compared to OMI satellite observations using the BEHR and NASA retrievals. Values are plotted on the 0.25°x0.3125° GEOS-Chem grid. The GEOS-Chem mean bias over the Figure domain and associated spatial standard deviation are inset in the bottom panel.

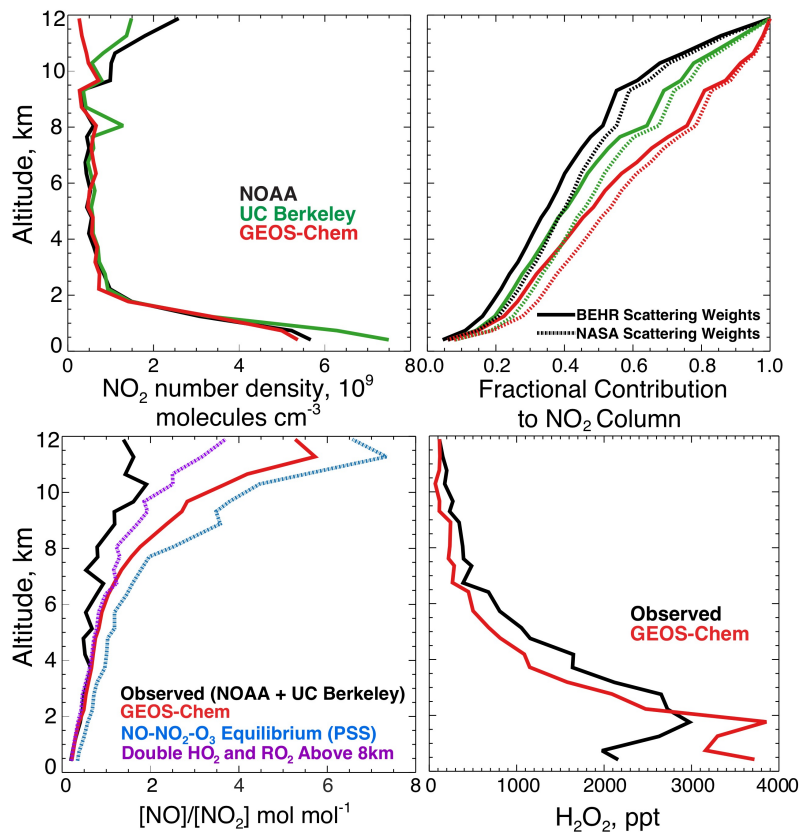

**Figure 6:** Vertical distribution of  $\text{NO}_2$  over the Southeast US during SEAC<sup>4</sup>RS (August-September 2013) and contributions to tropospheric  $\text{NO}_2$  columns measured from space by OMI. The top left panel shows median vertical profiles of  $\text{NO}_2$  number density measured from the SEAC<sup>4</sup>RS aircraft by the NOAA and UC Berkeley instruments and simulated by GEOS-Chem. The middle top right panel shows the fractional contribution of  $\text{NO}_2$  below a given altitude to the total tropospheric  $\text{NO}_2$  slant column measured by OMI, accounting for increasing sensitivity with altitude as determined from the retrieval scattering weights. The right bottom left panel shows the mean median vertical profiles of the daytime  $[\text{NO}]/[\text{NO}_2]$  molar concentration ratio in the aircraft observations (NOAA for NO and UC Berkeley for  $\text{NO}_2$ ) and in GEOS-Chem. Also shown is the ratio computed from NO- $\text{NO}_2$ - $\text{O}_3$  photochemical steady state (PSS) as given by reactions (5)+(7) (blue) and including reaction (6) with doubled  $\text{HO}_2$  and  $\text{RO}_2$  concentrations above 8km (purple). The bottom right panel shows the median  $\text{H}_2\text{O}_2$  profile from the model and from the SEAC<sup>4</sup>RS flights over the Southeast US.  $\text{H}_2\text{O}_2$  was measured by the Caltech CIMS (see Figure 2).

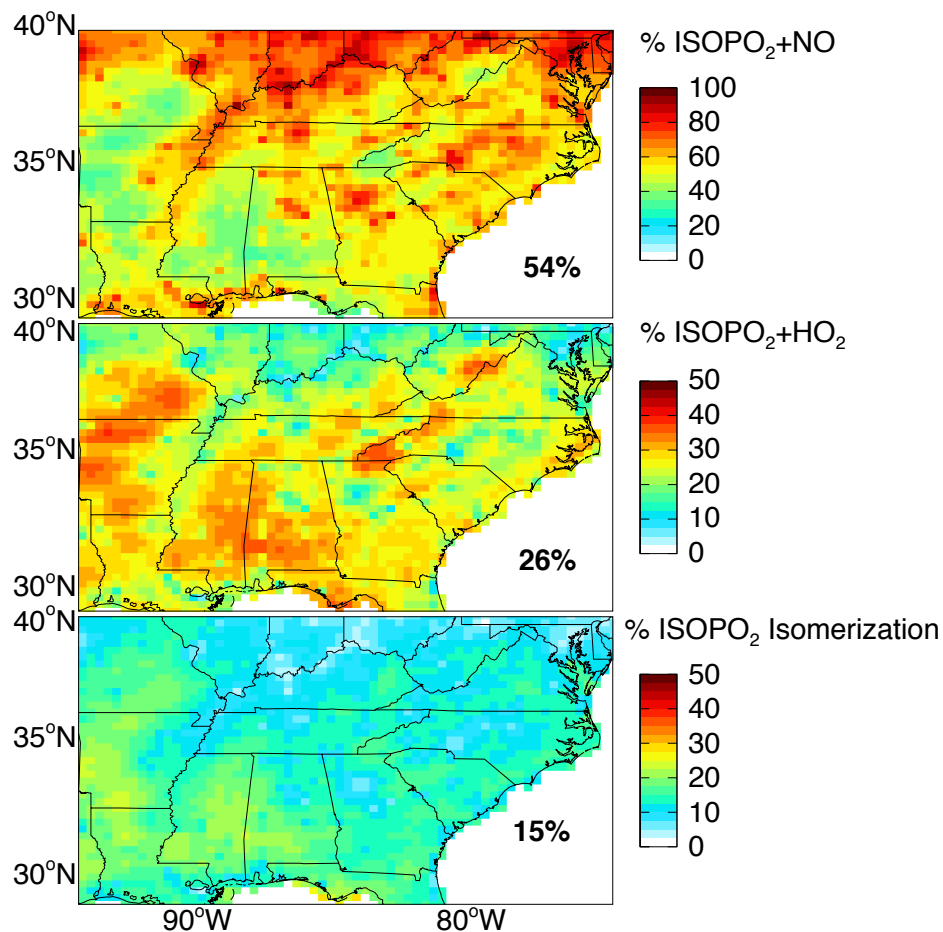

**Figure 7:** Branching ratios for the fate of the isoprene peroxy radical (ISOPO<sub>2</sub>) as simulated by GEOS-Chem over the Southeast US for August-September 2013. Values are percentages of ISOPO<sub>2</sub> that react with NO, HO<sub>2</sub>, or isomerize from the total mass of isoprene reacting over the domain. Note the difference in scale between the top panel and the lower two panels. Regional mean percentages for the Southeast US are shown inset. They add up to less than 100% because of the small ISOPO<sub>2</sub> sink from reaction with other organic peroxy radicals (RO<sub>2</sub>).

5

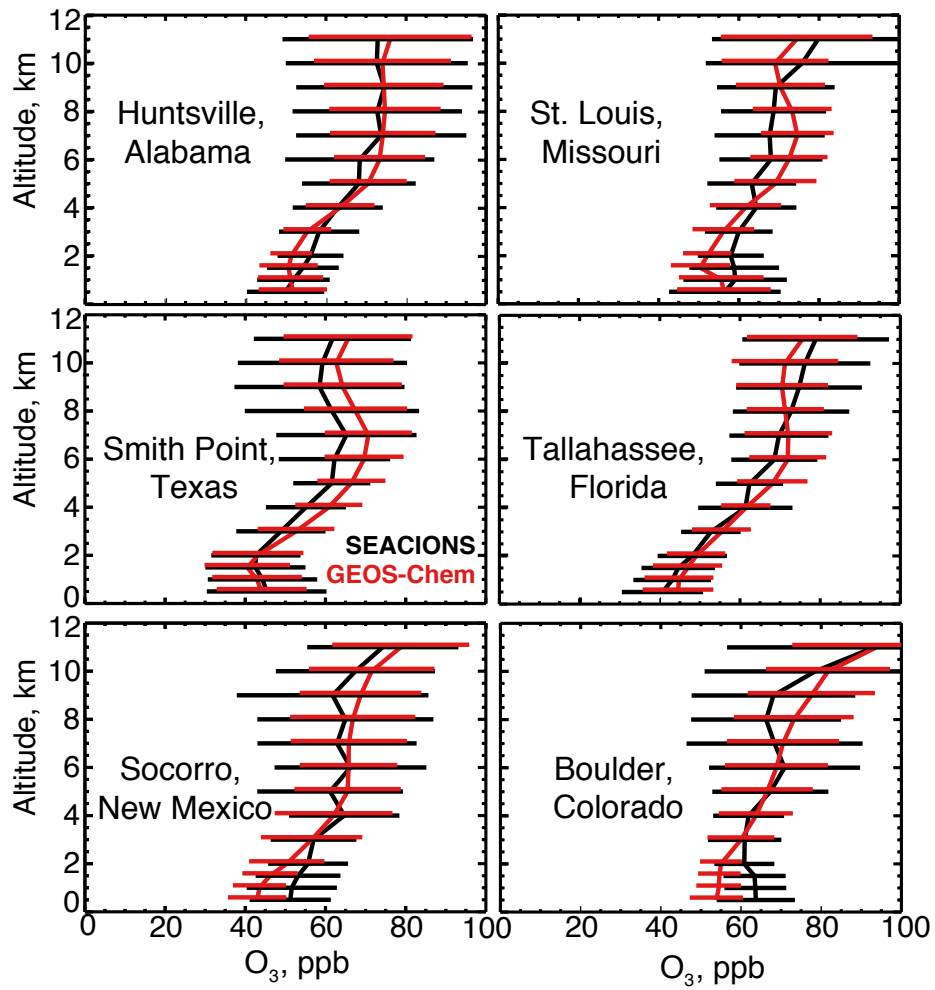

**Figure 8:** Mean ozonesonde vertical profiles at the US SEACIONS sites (<http://croc.gsfc.nasa.gov/seacions/>) during the SEAC<sup>4</sup>RS campaign in August-September 2013. An average of 2520 sondes were launched per site between 11am-9am and 2pm-4pm local time. Ozonesondes at Smith Point, Texas were only launched in September. Model values are coincident with the launches. Data are averaged vertically over 0.5 km bins below 2 km altitude and 1.0 km bins above. Also shown are standard deviations.

5



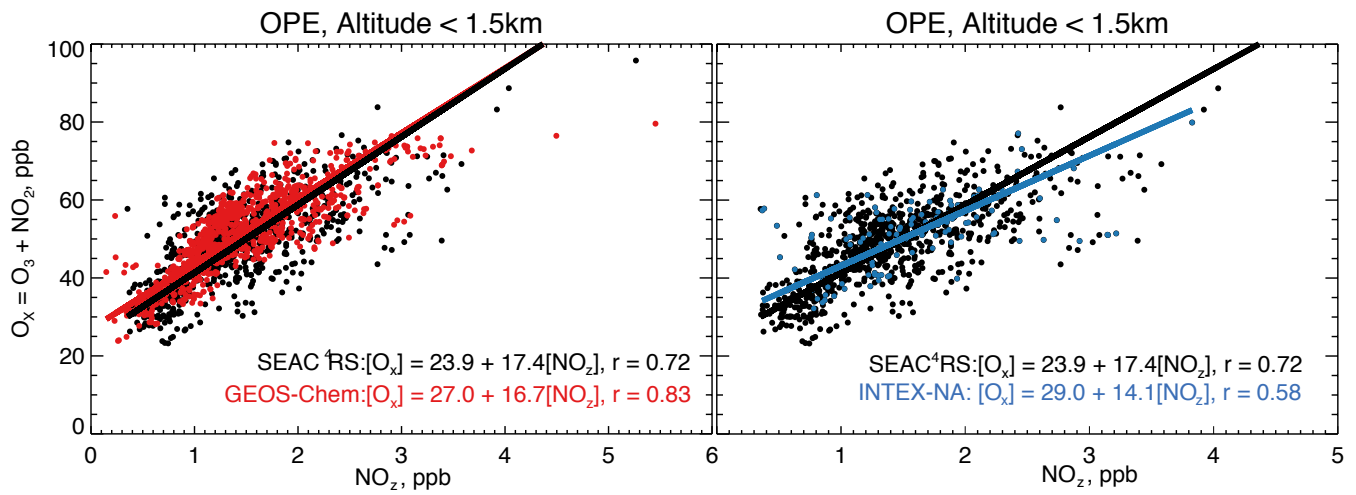

**Figure 9:** Ozone production efficiency (OPE) over the Southeast US in summer estimated from the relationship between odd oxygen ( $O_x$ ) and the sum of  $NO_x$  oxidation products ( $NO_2$ ) below 1.5 km altitude. The left panel compares SEAC<sup>4</sup>RS observations to GEOS-Chem values for August-September 2013 (data from Figure 2). The right panel compares SEAC<sup>4</sup>RS observations to INTEX-NA aircraft observations collected over the same Southeast US domain in summer 2004 (Singh et al., 2006).  $NO_2$  is defined here as  $HNO_3 + PAN +$  alkyl nitrates, all of which were measured from the SEAC<sup>4</sup>RS and INTEX-NA aircraft. The slope and intercept of the reduced-major-axis (RMA) regression are provided inset with the correlation coefficient ( $r$ ). Observations for INTEX-NA were obtained from <ftp://ftp-air.larc.nasa.gov/pub/INTEXA/>.

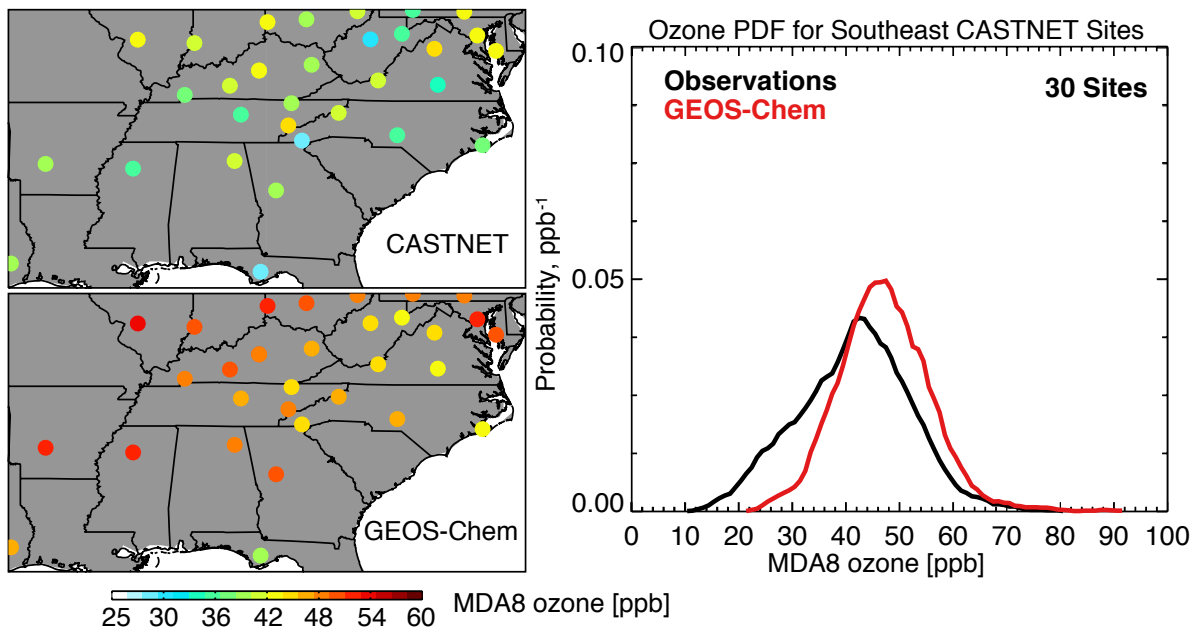

**Figure 10:** Maximum daily 8-h average (MDA8) ozone concentrations at the 3230 CASTNET sites in the Southeast US in June-August 2013. The left panels show seasonal mean values in the observations and GEOS-Chem. The right panel shows the probability density functions (pdfs) of daily values at the 30 sites.

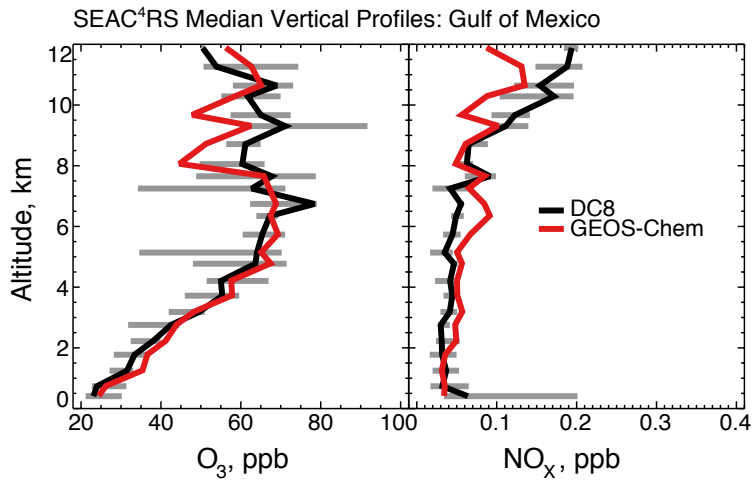

**Figure 11:** Median vertical profiles of ozone and NO<sub>x</sub> concentrations over the Gulf of Mexico during SEAC<sup>4</sup>RS. Observations are from four SEAC<sup>4</sup>RS flights over the Gulf of Mexico (August 12, September 4, 13, 16). GEOS-Chem model values are sampled along the flight tracks. The 25<sup>th</sup> and 75<sup>th</sup> percentiles of the aircraft observations are shown as horizontal bars.

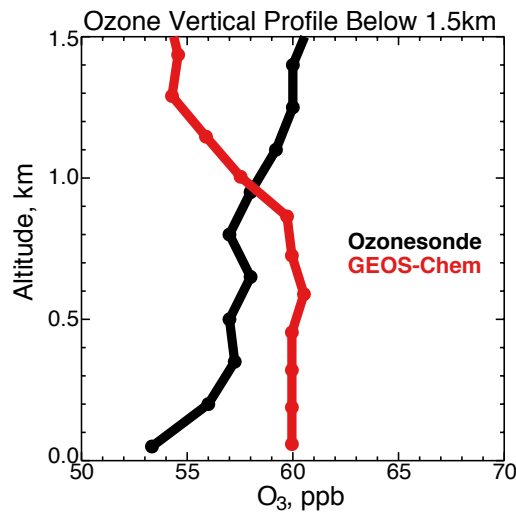

**Figure 12:** Median vertical profile of ozone concentrations over St. Louis, Missouri and Huntsville, Alabama during August and September 2013. Observations from SEACIONS ozonesondes launched between 10 and 13 local time ( $n=57$  launches) are compared to GEOS-Chem results sampled at the times of the ozonesonde launches and at the vertical resolution of the model (11 layers below 1.5km, red circles). The ozonesonde data are shown at 50m resolution. There are no ozonesonde data below 200.

5

10
